# Supplementary material for: The Influenza Vaccine May Protect Pregnant and Postpartum Women against Severe COVID-19
Source: MDPI journal article supplement (doi:10.3390/vaccines10020206), 2022-01-28
Supplement: s1 [file s1]

# Documentation of the article ‘Influenza vaccine confers protection against severe COVID-19 perinatally’

Codes and outputs

December 02, 2021

## Sumário

|                                                                  |           |
|------------------------------------------------------------------|-----------|
| <b>Description</b>                                               | <b>2</b>  |
| <b>About the database and R packages used</b>                    | <b>2</b>  |
| <b>Case selection and data treatment</b>                         | <b>4</b>  |
| <b>Epidemiologic characteristics</b>                             | <b>10</b> |
| <b>Comorbidities</b>                                             | <b>15</b> |
| <b>Symptoms</b>                                                  | <b>24</b> |
| <b>Outcome</b>                                                   | <b>34</b> |
| <b>Time between covid vaccine and first symptoms of covid-19</b> | <b>38</b> |
| <b>Propensity Scoring Matching (PSM)</b>                         | <b>39</b> |
| <b>Vaccination and mortality maps</b>                            | <b>65</b> |

## Description

This file presents the documentation of the analysis of article “Influenza vaccine confers protection against severe COVID-19 perinatally”.

## About the database and R packages used

The data are analyzed using the free-software R (<https://www.R-project.org>) in version 4.0.3. Next, we present and load the libraries used in the data analysis process.

```
#load packages
loadlibrary <- function(x) {
  if (!require(x, character.only = TRUE)) {
    install.packages(x, dependencies = T)
    if (!require(x, character.only = TRUE))
      stop("Package not found")
  }
}

packages <-
  c(
    "readr",
    "readxl",
    "janitor",
    "dplyr",
    "forcats",
    "stringr",
    "lubridate",
    "summarytools",
    "magrittr",
    "questionr",
    "knitr",
    "data.table",
    "modelsummary",
    "kableExtra",
    "DescTools",
    "ggplot2",
    "effectsize",
    "WeightIt",
    "MatchIt",
    "ggplot2",
    "ggpubr"
  )

lapply(packages, loadlibrary)
```

One can see below the functions that will be used in the data analysis.

```
#functions for summary measures
media <- function(x)
  mean(x, na.rm = TRUE)
mediana <- function(x)
```

```

median(x, na.rm = TRUE)
DP <- function(x)
  sd(x, na.rm = TRUE)
minimo <- function(x)
  base::min(x, na.rm = TRUE)
maximo <- function(x)
  base::max(x, na.rm = TRUE)
q25 <- function(x)
  stats::quantile(x, p = 0.25, na.rm = TRUE)
q75 <- function(x)
  stats::quantile(x, p = 0.75, na.rm = TRUE)
IQR <- function(x)
  round(q75(x) - q25(x), 2)
n <- function(x)
  sum(!is.na(x))

```

This is a retrospective cohort study using the data from the Influenza Epidemiological Surveillance Information System, SIVEP-Gripe (Sistema de Informação de Vigilância Epidemiológica da Gripe) database.

The SIVEP-Gripe is a nationwide surveillance database created to monitor severe acute respiratory infections and data on virus circulation and respiratory infections in Brazil. Flu cases should be notified for individuals presenting fever and cough and/or sore throat in sentinel monitoring units. In 2009, with the burden of the H1N1 pandemic, a rigorous surveillance of the cases of severe acute respiratory syndrome (SARS) was adopted, with compulsory notification of all SARS cases. The definition of SARS included the presence of fever, cough and dyspnea. Since 2010, only hospitalized cases of SARS must be notified, both in public and in private hospitals, as well as cases of deaths caused by SARS, irrespective of hospitalization. Once virus surveillance for public health purposes has dynamic characteristics, frequent updates are made in notification guidelines. At the time of COVID-19 pandemic, cases of SARS must be notified in the presence of at least two of the following symptoms: fever, chills, sore throat, headache, cough, runny nose, olfactory or taste disorders PLUS dyspnea or chest pressure or saturation less than 95% or blue coloration of lips or face. Only cases of hospitalized SARS or SARS-related death must be notified. The SIVEP-Gripe records contain demographic, clinical and epidemiological data, as well as laboratory/etiologi- cal results. There is also information about hospital admission and disease progression (recovery or death).

The period analyzed comprises epidemiological data from 2020, with a database obtained on August 10, 2021 on the website <https://opendatusus.saude.gov.br/dataset/bd-srag-2020>, and from 2021, with a database obtained on August 10, 2021 on the website <https://opendatusus.saude.gov.br/dataset/bd-srag-2021>. These datasets can be obtained at [https://drive.google.com/drive/folders/1s3SwBWlCRS9pkEsv2sWftA-qGqJ\\_jTA1?usp=sharing](https://drive.google.com/drive/folders/1s3SwBWlCRS9pkEsv2sWftA-qGqJ_jTA1?usp=sharing). They are loaded and combined below:

```

#loading the datasets
#2021
dados_a <- read_delim(
  "INFLUD21-02-08-2021.csv",
  ";",
  escape_double = FALSE,
  locale = locale(encoding = "ISO-8859-2"),
  trim_ws = TRUE
)

#2020
dados_b <- read_delim(
  "INFLUD-02-08-2021.csv",
  ";",

```

```

escape_double = FALSE,
locale = locale(encoding = "ISO-8859-2"),
trim_ws = TRUE
)

#### Concatenating 2020 and 2021 datasets #####
dados_a <- dados_a %>%
  mutate(FATOR_RISC = case_when(FATOR_RISC == 1 ~ "S",
                                FATOR_RISC == 2 ~ "N"))
dados_b <- dados_b %>%
  mutate(FATOR_RISC = case_when(FATOR_RISC == 1 ~ "S",
                                FATOR_RISC == 2 ~ "N"))

# dados_b$OBES_IMC <- as.numeric(dados_b$OBES_IMC)

dados <- full_join(dados_a, dados_b)

#Create case year variable
dados <- dados %>%
  dplyr::mutate(
    dt_sint = as.Date(DT_SIN_PRI, format = "%d/%m/%Y"), #date of first symptoms
    dt_nasc = as.Date(DT_NASC, format = "%d/%m/%Y"), #date of birth
    dt_vac_gripe = as.Date(DT_UT_DOSE, format = "%d/%m/%Y"), #date of Influenza vaccine
    ano = lubridate::year(dt_sint), #year of the case
  )

```

There are 2528374 observations in the database. To see the dictionary of variables, access (in Portuguese): <https://opendatasus.saude.gov.br/dataset/ae90fa8f-3e94-467e-a33f-94adbb66edf8/resource/8f571374-c555-4ec0-8e44-00b1e8b11c25/download/dicionario-de-dados-srag-hospitalizado-27.07.2020-final.pdf>

## Case selection and data treatment

The first filter is to select cases from February 16, 2020 (8th epidemiological week of symptoms of 2020) to May 1, 2021 (epidemiological week 17 of 2021).

```

#selection of cases from February 16, 2020 (8th epidemiological week of symptoms of 2020)
#to May 1, 2021 (week 17 of 2021).
sem <- 17

dados1 <- dados %>%
  filter((ano == 2020 & SEM_PRI >=8) | ano == 2021)

#week 53 has the first two days of 2021 and the year is 2021, but it's actually 2020.
dados1 <- dados1 %>%
  mutate(ano = ifelse(ano == 2021 & SEM_PRI ==53, 2020, ano)) %>%
  filter(ano == 2020 | (ano == 2021 & SEM_PRI <= sem))

```

There are 2046405 observations in the database after selection of valid years.

The next selection is female:

```
#filtering F
dados2 <- filter(dados1, CS_SEXO == "F")
```

There are 936313 observations in the database.

Selection of women of childbearing age (10 to 55 years):

```
#creating the age variable as the difference between dt_sint and dt_nasc.
#In cases without dt_nasc, we consider
#the NU_AGE_N field
dados2 <- dados2 %>%
  mutate(
    idade = as.period(interval(start = dt_nasc, end = dt_sint))$year,
    age = ifelse(is.na(idade), NU_IDADE_N, idade)
  )

#Filtering of cases aged 55 and under
dados3 <- dados2 %>%
  filter(age > 9 & age <= 55)
```

There are 332889 observations in the database.

The next step is to identify pregnant and postpartum people (variable `classi_gesta_puerp`) and then select only those cases.

```
#Creating the classification variable if pregnant, postpartum and
##neither pregnant nor postpartum
dados3 <- dados3 %>%
  mutate(
    classi_gesta_puerp = case_when(
      CS_GESTANT == 1 ~ "1tri",
      CS_GESTANT == 2 ~ "2tri",
      CS_GESTANT == 3 ~ "3tri",
      CS_GESTANT == 4 ~ "IG_ig",
      CS_GESTANT == 5 &
        PUERPERA == 1 ~ "puerp",
      CS_GESTANT == 9 & PUERPERA == 1 ~ "puerp",
      TRUE ~ "não" #no
    )
  )

freq(dados3$classi_gesta_puerp)
```

```
##          n    % val%
## 1tri    2034  0.6  0.6
## 2tri    4815  1.4  1.4
## 3tri   10477  3.1  3.1
## IG_ig    964  0.3  0.3
## não   309604 93.0 93.0
## puerp    4995  1.5  1.5
```

```
#filtering only pregnant and postpartum women
dados4 <- dados3 %>%
  filter(classi_gesta_puerp != "não")
```

There are 23285 observations in the database.

We selected only confirmed cases of COVID-19.

```
dados4 <- dados4 %>%
  mutate(
    classi_fin = case_when(
      CLASSI_FIN == 5 ~ "covid",
      TRUE ~ "não" #no
    )
  )

#filtering only covid cases
dados5 <- dados4 %>%
  filter(CLASSI_FIN == 5)
```

There are 12640 observations in the database.

Now let's select the cases of COVID by PCR or antigen, but which are also not positive for Influenza.

```
#COVID case diagnosed by PCR
dados5 <- dados5 %>%
  mutate(pcr_covid_SN = case_when(
    (PCR_SARS2 == 1) |
    (
      str_detect(DS_PCR_OUT, "SARS|COVID|COV|CORONA|CIVID")
    ) ~ "sim", #yes
    TRUE ~ "não" #no
  ))

#Influenza case diagnosed by PCR
dados5 <- dados5 %>%
  mutate(pcr_influenza_SN = case_when(
    (POS_PCRFLU == 1) |
    (
      str_detect(DS_PCR_OUT, "INFLU|INFLUENZA")
    ) ~ "sim", #yes
    TRUE ~ "não" #no
  ))

with(dados5, table(pcr_influenza_SN, pcr_covid_SN))
```

```
##                pcr_covid_SN
## pcr_influenza_SN  não  sim
##                não 4603 8027
##                sim   0   10
```

There are 10 cases that are positive for COVID and for Influenza by PCR.

```
#Case of COVID diagnosed by antigen
dados5 <- dados5 %>%
  mutate(antigenio_covid_SN = case_when(
    (AN_SARS2 == 1) |
```

```

    (
      str_detect(DS_AN_OUT, "SARS|COVID|COV|CORONA|CIVID")
    ) ~ "sim", #yes
    TRUE ~ "não" #no
  ))

#Influenza case diagnosed by antigen
dados5 <- dados5 %>%
  mutate(antigenio_influenza_SN = case_when(
    (POS_AN_FLU == 1) |
    (
      str_detect(DS_AN_OUT, "INFLU|INFLUENZA")
    ) ~ "sim", #yes
    TRUE ~ "não" #no
  ))

with(dados5, table(antigenio_influenza_SN, antigenio_covid_SN))

```

```

##               antigenio_covid_SN
## antigenio_influenza_SN  não  sim
##               não 11413  1226
##               sim    1    0

```

There are no positive cases for COVID and for Influenza by antigen.

We will now select the cases of COVID confirmed by PCR or antigen.

```
with(dados5, table(pcr_covid_SN, antigenio_covid_SN))
```

```

##               antigenio_covid_SN
## pcr_covid_SN  não  sim
##               não 3527 1076
##               sim 7887  150

```

```

#filtering only covid cases by PCR or antigen
dados6 <- dados5 %>%
  filter(pcr_covid_SN == "sim" | antigenio_covid_SN == "sim")

```

There are 9113 observations in the database.

Now it's time to remove cases that are also positive for Influenza.

```
with(dados6, table(pcr_influenza_SN, antigenio_influenza_SN))
```

```

##               antigenio_influenza_SN
## pcr_influenza_SN  não  sim
##               não 9102   1
##               sim  10   0

```

```
#filtering only negative cases of Influenza by PCR or antigen
dados7 <- dados6 %>%
  filter(pcr_influenza_SN != "sim" & antigenio_influenza_SN != "sim") #'sim' means 'yes'
```

There are 9102 observations in the database.

Finally, we will only select the finalized cases (death or cure). The variable that indicates the outcome is EVOLUCAO, with the categories: 1-Cure; 2-Death; 3- Death from other causes; 9-Ignored.

```
with(dados7, freq(EVOLUCAO))
```

```
##      n    % val%
## 1  7185 78.9 84.6
## 2   991 10.9 11.7
## 3    14  0.2  0.2
## 9   302  3.3  3.6
## NA   610  6.7  NA
```

Let's select only the finalized cases:

```
#filtering only completed cases
dados8 <- dados7 %>%
  filter((EVOLUCAO == 1 | EVOLUCAO == 2 | EVOLUCAO == 3) & !is.na(EVOLUCAO))
```

```
#creating the evolution variable
dados8 <- dados8 %>%
  mutate(death = case_when(
    EVOLUCAO == 1 ~ "cure",
    EVOLUCAO == 2 ~ "death",
    EVOLUCAO == 3 ~ "death"
  ))
```

```
with(dados8, freq(death))
```

```
##      n    % val%
## cure  7185 87.7 87.7
## death 1005 12.3 12.3
```

There are 8190 observations in the database.

## Vaccination variable analysis

Let's look at the variable that indicates whether the person was vaccinated for H1n1 (variable vaccine).

```
#recoding the influenza vaccine variable
dados8 <- dados8 %>%
  mutate(vaccine = case_when(
    VACINA == 1 ~ "yes",
    VACINA == 2 ~ "no",
    TRUE ~ NA_character_
```



```

))
#Influenza vaccine indicator frequency table
with(dados8, freq(vaccine))

```

```

##           n      % val%
## no   2538 31.0 66.6
## yes  1275 15.6 33.4
## NA   4377 53.4   NA

```

Let's now create the time variable between the Influenza vaccine (for those who took it) and the first symptoms of COVID-19.

```

dados8 <- dados8 %>%
  mutate(
    time_vaccine_symptoms = as.numeric(dt_sint - dt_vac_gripe)
  )

dados8_aux <- dados8 %>%
  filter(vaccine == "no")
sum(is.na(dados8_aux$time_vaccine_symptoms))

```

```
## [1] 2538
```

```

dados8_aux <- dados8 %>%
  filter(is.na(vaccine))
sum(is.na(dados8_aux$time_vaccine_symptoms))

```

```
## [1] 4377
```

```

dados8_aux <- dados8 %>%
  filter(vaccine == "yes")
summary(dados8_aux$time_vaccine_symptoms)

```

```

##      Min. 1st Qu.  Median    Mean 3rd Qu.    Max.   NA's
##    -41.0   27.0   79.5   113.0   177.0   687.0    403

```

Note that when `vaccine = no` there is no information about time between vaccine and symptoms, as expected.

Among those vaccinated, there are 403 pregnant and postpartum women without information on the date of vaccination. Note that there is still negative data (date of first symptom was less than date of Influenza vaccination).

The next step is filtering cases that the vaccine was applied before the first symptoms of COVID-19 for those who have been vaccinated.

```

#Filtering positive time_vaccine_symptoms (vaccine before sympthoms)
data_final <- dados8 %>%
  filter(vaccine == "no" | (vaccine == "yes" & time_vaccine_symptoms > 0))

```

```
with(data_final, freq(vaccine))
```

```
##           n      % val%  
## no  2538 75.3 75.3  
## yes   832 24.7 24.7
```

## Epidemiologic characteristics

```
# Ethnicity  
data_final <- data_final %>%  
  mutate(  
    ethnicity = case_when(  
      CS_RACA == 1 ~ "white",  
      CS_RACA == 2 ~ "black",  
      CS_RACA == 3 ~ "yellow",  
      CS_RACA == 4 ~ "brown",  
      CS_RACA == 5 ~ "indigenous",  
      TRUE ~ NA_character_  
    ),  
    white_color = case_when(  
      ethnicity == "white" ~ "yes",  
      is.na(ethnicity) ~ NA_character_,  
      TRUE ~ "no"  
    )  
  )  
  
# Education  
data_final <- data_final %>%  
  mutate(  
    education = case_when(  
      CS_ESCOL_N == 0 ~ "no school",  
      CS_ESCOL_N == 1 ~ "fund1",  
      CS_ESCOL_N == 2 ~ "fund2",  
      CS_ESCOL_N == 3 ~ "high school",  
      CS_ESCOL_N == 4 ~ "college",  
      TRUE ~ NA_character_  
    ),  
    education2 = case_when(  
      CS_ESCOL_N <= 2 ~ "up to 9 years",  
      CS_ESCOL_N == 3 ~ "from 9 to 12 years",  
      CS_ESCOL_N == 4 ~ "over 12 years",  
      TRUE ~ NA_character_  
    )  
  )  
data_final$education2 <-  
  factor(data_final$education2, levels = c("up to 9 years", "from 9 to 12 years", "over 12 years"))  
  
# Age group  
data_final <- data_final %>%  
  mutate(  
    
```

```

    age_group = case_when(
      age <= 19 ~ "<20",
      age >= 20
      & age <= 34 ~ "20-34",
      age >= 35 ~ ">=35",
      TRUE ~ NA_character_
    )
  )
data_final$age_group <-
  factor(data_final$age_group, levels = c("<20", "20-34", ">=35"))

# residence area
data_final <- data_final %>%
  mutate(
    residence = case_when(
      CS_ZONA == 1 ~ "urban",
      CS_ZONA == 2 ~ "rural",
      CS_ZONA == 3 ~ "periurban",
      TRUE ~ NA_character_
    )
  )
)

```

## Ethnicity

```
with(data_final, ctable(ethnicity, vaccine, prop = "c", useNA = "no", chisq = FALSE, OR = TRUE))
```

```
## Cross-Tabulation, Column Proportions
## ethnicity * vaccine
## Data Frame: data_final
##
## -----
##          vaccine          no          yes          Total
## ethnicity
##   black          134 ( 5.8%)          49 ( 6.3%)          183 ( 5.9%)
##   brown          1141 (49.4%)          325 (42.0%)          1466 (47.6%)
## indigenous           9 ( 0.4%)           5 ( 0.6%)           14 ( 0.5%)
##   white           997 (43.2%)          387 (50.1%)          1384 (44.9%)
##   yellow           27 ( 1.2%)           7 ( 0.9%)           34 ( 1.1%)
##   Total          2308 (100.0%)          773 (100.0%)          3081 (100.0%)
## -----
```

```
fisher.test(data_final$ethnicity, data_final$vaccine)
```

```
##
## Fisher's Exact Test for Count Data
##
## data: data_final$ethnicity and data_final$vaccine
## p-value = 0.005438
## alternative hypothesis: two.sided
```

## White color

```
with(data_final, ctable(white_color, vaccine, prop = "c", useNA = "no", chisq = TRUE, OR = TRUE))
```

```
## Cross-Tabulation, Column Proportions
## white_color * vaccine
## Data Frame: data_final
##
## -----
##      vaccine      no      yes      Total
## white_color
##      no      1311 ( 56.8%)  386 ( 49.9%)  1697 ( 55.1%)
##      yes      997 ( 43.2%)  387 ( 50.1%)  1384 ( 44.9%)
##      Total    2308 (100.0%)  773 (100.0%)  3081 (100.0%)
## -----
##
## -----
##      Chi.squared  df  p.value
## -----
##      10.7608      1    0.001
## -----
##
## -----
##      Odds Ratio  Lo - 95%  Hi - 95%
## -----
##      1.32        1.12      1.55
## -----
```

## Education

```
with(data_final, ctable(education, vaccine, prop = "c", useNA = "no", chisq = FALSE, OR = TRUE))
```

```
## Cross-Tabulation, Column Proportions
## education * vaccine
## Data Frame: data_final
##
## -----
##      vaccine      no      yes      Total
## education
##      college      249 ( 17.7%)  139 ( 24.1%)  388 ( 19.6%)
##      fund1        106 (  7.5%)   25 (  4.3%)  131 (  6.6%)
##      fund2        237 ( 16.9%)   77 ( 13.3%)  314 ( 15.8%)
##      high school   806 ( 57.3%)  335 ( 58.1%) 1141 ( 57.5%)
##      no school      8 (  0.6%)   1 (  0.2%)   9 (  0.5%)
##      Total        1406 (100.0%)  577 (100.0%) 1983 (100.0%)
## -----
```

## Education (years)

```
with(data_final, ctable(education2, vaccine, prop = "c", useNA = "no", chisq = TRUE, OR = TRUE))
```

```
## Cross-Tabulation, Column Proportions
## education2 * vaccine
## Data Frame: data_final
##
##
## -----
##               vaccine              no              yes              Total
##      education2
##      up to 9 years           351 ( 25.0%)       103 ( 17.9%)       454 ( 22.9%)
##      from 9 to 12 years       806 ( 57.3%)       335 ( 58.1%)      1141 ( 57.5%)
##      over 12 years           249 ( 17.7%)       139 ( 24.1%)       388 ( 19.6%)
##      Total                   1406 (100.0%)       577 (100.0%)      1983 (100.0%)
## -----
##
## -----
##      Chi.squared   df   p.value
## -----
##      17.592        2    2e-04
## -----
```

## Gestational moment

```
with(data_final, ctable(classi_gesta_puerp, vaccine, prop = "c", useNA = "no", chisq = TRUE, OR = TRUE))
```

```
## Cross-Tabulation, Column Proportions
## classi_gesta_puerp * vaccine
## Data Frame: data_final
##
##
## -----
##               vaccine              no              yes              Total
##      classi_gesta_puerp
##      1tri             213 (  8.4%)        49 (  5.9%)       262 (  7.8%)
##      2tri             587 ( 23.1%)       173 ( 20.8%)       760 ( 22.6%)
##      3tri            1181 ( 46.5%)       457 ( 54.9%)      1638 ( 48.6%)
##      IG_ig             77 (  3.0%)        14 (  1.7%)        91 (  2.7%)
##      puerp             480 ( 18.9%)       139 ( 16.7%)       619 ( 18.4%)
##      Total            2538 (100.0%)       832 (100.0%)      3370 (100.0%)
## -----
##
## -----
##      Chi.squared   df   p.value
## -----
##      21.5466        4    2e-04
## -----
```

## Age

```
datasummary((vaccine) ~ age*(n+media+DP+mediana+q25+q75+IQR),  
            data = data_final, output = 'markdown')
```

|     | n       | media | DP   | mediana | q25   | q75   | IQR   |
|-----|---------|-------|------|---------|-------|-------|-------|
| no  | 2538.00 | 30.44 | 7.27 | 30.00   | 25.00 | 35.00 | 10.00 |
| yes | 832.00  | 29.81 | 6.78 | 30.00   | 25.00 | 34.25 | 9.25  |

```
#t-test
```

```
t.test(age ~ vaccine, data = data_final)
```

```
##  
## Welch Two Sample t-test  
##  
## data: age by vaccine  
## t = 2.2691, df = 1506.4, p-value = 0.0234  
## alternative hypothesis: true difference in means between group no and group yes is not equal to 0  
## 95 percent confidence interval:  
## 0.08480425 1.16655585  
## sample estimates:  
## mean in group no mean in group yes  
## 30.43578 29.81010
```

```
#effect size
```

```
c_cohen <- cohens_d(age ~ as.factor(vaccine), data=data_final)  
c_cohen
```

```
## Cohen's d | 95% CI  
## -----  
## 0.09 | [0.01, 0.17]  
##  
## - Estimated using pooled SD.
```

```
interpret_d(c_cohen$Cohens_d, rules="cohen1988")
```

```
## [1] "very small"  
## (Rules: cohen1988)
```

## Age group

```
with(data_final, ctable(age_group, vaccine, prop = "c", useNA = "no", chisq = TRUE, OR = TRUE))
```

```
## Cross-Tabulation, Column Proportions  
## age_group * vaccine  
## Data Frame: data_final
```

```
##
##
## -----
##      vaccine      no      yes      Total
## age_group
##   <20           169 ( 6.7%)   63 ( 7.6%)   232 ( 6.9%)
##   20-34         1633 ( 64.3%)  561 ( 67.4%)  2194 ( 65.1%)
##   >=35           736 ( 29.0%)  208 ( 25.0%)   944 ( 28.0%)
##   Total         2538 (100.0%)  832 (100.0%)  3370 (100.0%)
## -----
##
## -----
## Chi.squared  df  p.value
## -----
##    5.2534     2  0.0723
## -----
```

## Residence area

```
with(data_final, ctable(residence, vaccine, prop = "c", useNA = "no", chisq = FALSE, OR = TRUE))
```

```
## Cross-Tabulation, Column Proportions
## residence * vaccine
## Data Frame: data_final
##
## -----
##      vaccine      no      yes      Total
## residence
## periurban         8 ( 0.3%)   2 ( 0.3%)   10 ( 0.3%)
##   rural          110 ( 4.6%)  39 ( 4.9%)  149 ( 4.7%)
##   urban          2270 ( 95.1%)  749 ( 94.8%)  3019 ( 95.0%)
##   Total          2388 (100.0%)  790 (100.0%)  3178 (100.0%)
## -----
```

```
fisher.test(data_final$residence, data_final$vaccine)
```

```
##
## Fisher's Exact Test for Count Data
##
## data: data_final$residence and data_final$vaccine
## p-value = 0.9147
## alternative hypothesis: two.sided
```

## Comorbidities

```
#Cardiac
data_final <- data_final %>%
  mutate(cardiac = case_when(CARDIOPATI == 1 ~ "yes",
```

```

CARDIOPATI == 2 ~ "no",
TRUE ~ NA_character_))

#Hematologic
data_final <- data_final %>%
  mutate(hematologic = case_when(HEMATOLOGI == 1 ~ "yes",
                                HEMATOLOGI == 2 ~ "no",
                                TRUE ~ NA_character_))

#Hepatic
data_final <- data_final %>%
  mutate(hepatic = case_when(HEPATICA == 1 ~ "yes",
                             HEPATICA == 2 ~ "no",
                             TRUE ~ NA_character_))

#Asthma
data_final <- data_final %>%
  mutate(asthma = case_when(ASMA == 1 ~ "yes",
                            ASMA == 2 ~ "no",
                            TRUE ~ NA_character_))

#Diabetes
data_final <- data_final %>%
  mutate(diabetes = case_when(DIABETES == 1 ~ "yes",
                              DIABETES == 2 ~ "no",
                              TRUE ~ NA_character_))

#Neurologic
data_final <- data_final %>%
  mutate(neurologic = case_when(NEUROLOGIC == 1 ~ "yes",
                                NEUROLOGIC == 2 ~ "no",
                                TRUE ~ NA_character_))

#Pneumologic
data_final <- data_final %>%
  mutate(pneumologic = case_when(PNEUMOPATI == 1 ~ "yes",
                                  PNEUMOPATI == 2 ~ "no",
                                  TRUE ~ NA_character_))

#Imunossupression
data_final <- data_final %>%
  mutate(imuno = case_when(IMUNODEPRE == 1 ~ "yes",
                           IMUNODEPRE == 2 ~ "no",
                           TRUE ~ NA_character_))

#Renal
data_final <- data_final %>%
  mutate(renal = case_when(RENAL == 1 ~ "yes",
                           RENAL == 2 ~ "no",
                           TRUE ~ NA_character_))

#Obesity
data_final <- data_final %>%

```



```

mutate(obesity = case_when(OBESIDADE == 1 ~ "yes",
                           OBESIDADE == 2 ~ "no",
                           TRUE ~ NA_character_))

#Any comorbidity

df <- data_final %>%
  select(cardiac,obesity,hematologic,hepatic,asthma,diabetes,neurologic,pneumologic,imuno,renal)

#if all comorbidities in df are NA (not available), return NA.
soma <- function(x){
  if (sum(is.na(x))==10)
    return(NA_character_)
  else
    return(sum(!is.na(x) & x=="yes"))
}
data_final$qt_comorb_aux <- apply(df,1,soma)

data_final <- data_final %>%
  mutate(comorbidity = case_when(qt_comorb_aux >=1 ~ "yes",
                                 qt_comorb_aux ==0 ~ "no",
                                 TRUE ~ NA_character_))

```

## Cardiac

```

with(data_final, ctable(vaccine, cardiac, prop = "r", useNA = "no", chisq = TRUE, OR = TRUE))

```

```

## Cross-Tabulation, Row Proportions
## vaccine * cardiac
## Data Frame: data_final
##
## -----
##          cardiac          no          yes          Total
## vaccine
##    no          994 (87.0%)    149 (13.0%)    1143 (100.0%)
##    yes          310 (83.6%)     61 (16.4%)     371 (100.0%)
##    Total        1304 (86.1%)    210 (13.9%)    1514 (100.0%)
## -----
##
## -----
## Chi.squared  df  p.value
## -----
##    2.4424     1  0.1181
## -----
##
## -----
## Odds Ratio   Lo - 95%   Hi - 95%
## -----
##    1.31       0.95      1.82
## -----

```

## Hematologic

```
with(data_final, ctable(vaccine, hematologic, prop = "r", useNA = "no", chisq = FALSE, OR = TRUE))
```

```
## Cross-Tabulation, Row Proportions
## vaccine * hematologic
## Data Frame: data_final
##
## -----
##           hematologic           no           yes           Total
## vaccine
##      no           1108 (98.8%)           14 (1.2%)           1122 (100.0%)
##      yes           353 (98.3%)            6 (1.7%)            359 (100.0%)
##      Total           1461 (98.6%)           20 (1.4%)           1481 (100.0%)
## -----
##
## -----
## Odds Ratio   Lo - 95%   Hi - 95%
## -----
##      1.35         0.51       3.53
## -----
```

```
fisher.test(data_final$hematologic, data_final$vaccine)
```

```
##
## Fisher's Exact Test for Count Data
##
## data: data_final$hematologic and data_final$vaccine
## p-value = 0.599
## alternative hypothesis: true odds ratio is not equal to 1
## 95 percent confidence interval:
##  0.4203391 3.7601885
## sample estimates:
## odds ratio
##  1.344915
```

## Diabetes

```
ctable(data_final$vaccine, data_final$diabetes, chisq=TRUE, prop="r", useNA = "no", OR = TRUE)
```

```
## Cross-Tabulation, Row Proportions
## vaccine * diabetes
## Data Frame: data_final
##
## -----
##           diabetes           no           yes           Total
## vaccine
```

```
##          no          995 (85.9%)   163 (14.1%)   1158 (100.0%)
##          yes          312 (84.1%)    59 (15.9%)    371 (100.0%)
##          Total        1307 (85.5%)   222 (14.5%)   1529 (100.0%)
## -----
##
## -----
## Chi.squared   df   p.value
## -----
##      0.6156      1   0.4327
## -----
##
## -----
## Odds Ratio    Lo - 95%    Hi - 95%
## -----
##      1.15        0.84      1.60
## -----
```

## Obesity

```
ctable(data_final$vaccine, data_final$obesity, chisq=TRUE, prop="r", useNA = "no", OR = TRUE)
```

```
## Cross-Tabulation, Row Proportions
## vaccine * obesity
## Data Frame: data_final
##
## -----
##          obesity          no          yes          Total
## vaccine
##      no          1015 (88.6%)   130 (11.4%)   1145 (100.0%)
##      yes          318 (86.9%)    48 (13.1%)    366 (100.0%)
##      Total        1333 (88.2%)   178 (11.8%)   1511 (100.0%)
## -----
##
## -----
## Chi.squared   df   p.value
## -----
##      0.6669      1   0.4141
## -----
##
## -----
## Odds Ratio    Lo - 95%    Hi - 95%
## -----
##      1.18        0.83      1.68
## -----
```

## Asthma

```
ctable(data_final$vaccine, data_final$asthma, chisq=TRUE, prop="r", useNA = "no", OR = TRUE)
```

```
## Cross-Tabulation, Row Proportions
## vaccine * asthma
## Data Frame: data_final
##
##
## -----
##          asthma          no          yes          Total
## vaccine
##      no          1052 (92.7%)      83 ( 7.3%)    1135 (100.0%)
##      yes           323 (87.8%)      45 (12.2%)     368 (100.0%)
##      Total        1375 (91.5%)     128 ( 8.5%)    1503 (100.0%)
## -----
##
## -----
## Chi.squared  df  p.value
## -----
##      7.999      1  0.0047
## -----
##
## -----
## Odds Ratio   Lo - 95%   Hi - 95%
## -----
##      1.77      1.20      2.59
## -----
```

## Hepatic

```
ctable(data_final$vaccine, data_final$hepatic, chisq=FALSE, prop="r", useNA = "no", OR = TRUE)
```

```
## Cross-Tabulation, Row Proportions
## vaccine * hepatic
## Data Frame: data_final
##
##
## -----
##          hepatic          no          yes          Total
## vaccine
##      no          1101 ( 99.0%)      11 (1.0%)    1112 (100.0%)
##      yes           359 ( 99.7%)       1 (0.3%)     360 (100.0%)
##      Total        1460 ( 99.2%)      12 (0.8%)    1472 (100.0%)
## -----
##
## -----
## Odds Ratio   Lo - 95%   Hi - 95%
## -----
##      0.279      0.036      2.167
## -----
```

```
fisher.test(data_final$vaccine, data_final$hepatic)
```

```
##
```

```
## Fisher's Exact Test for Count Data
##
## data: data_final$vaccine and data_final$hepatic
## p-value = 0.3134
## alternative hypothesis: true odds ratio is not equal to 1
## 95 percent confidence interval:
## 0.006463293 1.931471269
## sample estimates:
## odds ratio
## 0.2789632
```

## Neurologic

```
ctable(data_final$vaccine, data_final$neurologic, chisq=TRUE, prop="r", useNA = "no", OR = TRUE)
```

```
## Cross-Tabulation, Row Proportions
## vaccine * neurologic
## Data Frame: data_final
##
## -----
##      neurologic      no      yes      Total
## vaccine
##      no      1102 (98.3%)    19 (1.7%)    1121 (100.0%)
##      yes      352 (97.2%)    10 (2.8%)    362 (100.0%)
##      Total    1454 (98.0%)    29 (2.0%)    1483 (100.0%)
## -----
##
## -----
##      Chi.squared    df    p.value
## -----
##      1.1173         1    0.2905
## -----
##
## -----
##      Odds Ratio    Lo - 95%    Hi - 95%
## -----
##      1.65          0.76        3.58
## -----
```

## Pneumologic

```
ctable(data_final$vaccine, data_final$pneumologic, chisq=TRUE, prop="r", useNA = "no", OR = TRUE)
```

```
## Cross-Tabulation, Row Proportions
## vaccine * pneumologic
## Data Frame: data_final
##
##
```

```
## -----
##           pneumologic           no           yes           Total
## vaccine
##     no           1103 (98.1%)    21 (1.9%)    1124 (100.0%)
##     yes           353 (97.5%)     9 (2.5%)     362 (100.0%)
##     Total        1456 (98.0%)    30 (2.0%)    1486 (100.0%)
## -----
##
## -----
## Chi.squared   df   p.value
## -----
##     0.2622      1   0.6086
## -----
##
## -----
## Odds Ratio    Lo - 95%    Hi - 95%
## -----
##     1.34        0.61       2.95
## -----
```

## Imunossupression

```
ctable(data_final$vaccine, data_final$imuno, chisq=TRUE, prop="r", useNA = "no", OR = TRUE)
```

```
## Cross-Tabulation, Row Proportions
## vaccine * imuno
## Data Frame: data_final
##
## -----
##           imuno           no           yes           Total
## vaccine
##     no           1083 (96.7%)    37 (3.3%)    1120 (100.0%)
##     yes           354 (98.3%)     6 (1.7%)     360 (100.0%)
##     Total        1437 (97.1%)    43 (2.9%)    1480 (100.0%)
## -----
##
## -----
## Chi.squared   df   p.value
## -----
##     2.0399      1   0.1532
## -----
##
## -----
## Odds Ratio    Lo - 95%    Hi - 95%
## -----
##     0.50        0.21       1.19
## -----
```

## Renal

```
ctable(data_final$vaccine, data_final$renal, chisq=FALSE, prop="r", useNA = "no", OR = TRUE)
```

```
## Cross-Tabulation, Row Proportions
## vaccine * renal
## Data Frame: data_final
##
## -----
##           renal           no           yes           Total
## vaccine
##      no      1100 (98.8%)    13 (1.2%)    1113 (100.0%)
##      yes      353 (98.6%)     5 (1.4%)     358 (100.0%)
##      Total    1453 (98.8%)    18 (1.2%)    1471 (100.0%)
## -----
##
## -----
## Odds Ratio   Lo - 95%   Hi - 95%
## -----
##      1.20      0.42      3.39
## -----
```

```
fisher.test(data_final$renal, data_final$vaccine)
```

```
##
## Fisher's Exact Test for Count Data
##
## data: data_final$renal and data_final$vaccine
## p-value = 0.7825
## alternative hypothesis: true odds ratio is not equal to 1
## 95 percent confidence interval:
##  0.332141 3.613119
## sample estimates:
## odds ratio
##  1.198399
```

## Any comorbidity

```
with(data_final, ctable(vaccine, comorbidity, prop = "r", useNA = "no", chisq = TRUE, OR = TRUE))
```

```
## Cross-Tabulation, Row Proportions
## vaccine * comorbidity
## Data Frame: data_final
##
## -----
##           comorbidity           no           yes           Total
## vaccine
```

```
##           no                748 (60.3%)   492 (39.7%)   1240 (100.0%)
##           yes                210 (52.4%)   191 (47.6%)    401 (100.0%)
##          Total                958 (58.4%)   683 (41.6%)   1641 (100.0%)
## -----
##
## -----
##  Chi.squared    df    p.value
## -----
##    7.5648        1    0.006
## -----
##
## -----
##  Odds Ratio    Lo - 95%    Hi - 95%
## -----
##    1.38         1.10       1.73
## -----
```

## Symptoms

```
# Fever
data_final <- data_final %>%
  mutate(fever = case_when(FEBRE == 1 ~ "yes",
                           FEBRE == 2 ~ "no",
                           TRUE ~ NA_character_))

# Cough
data_final <- data_final %>%
  mutate(cough = case_when(TOSSE == 1 ~ "yes",
                           TOSSE == 2 ~ "no",
                           TRUE ~ NA_character_))

# Sore throat
data_final <- data_final %>%
  mutate(sore_throat = case_when(GARGANTA == 1 ~ "yes",
                                  GARGANTA == 2 ~ "no",
                                  TRUE ~ NA_character_))

# Dyspnea
data_final <- data_final %>%
  mutate(dyspnea = case_when(DISPNEIA == 1 ~ "yes",
                              DISPNEIA == 2 ~ "no",
                              TRUE ~ NA_character_))

# Respiratory discomfort
data_final <- data_final %>%
  mutate(resp_disc = case_when(DESC_RESP == 1 ~ "yes",
                                DESC_RESP == 2 ~ "no",
                                TRUE ~ NA_character_))

# Desaturation
data_final <- data_final %>%
```



```

mutate(desaturation = case_when(SATURACAO == 1 ~ "yes",
                                SATURACAO == 2 ~ "no",
                                TRUE ~ NA_character_))

# Diarrhea
data_final <- data_final %>%
  mutate(diarrhea = case_when(DIARREIA == 1 ~ "yes",
                              DIARREIA == 2 ~ "no",
                              TRUE ~ NA_character_))

# Vomit
data_final <- data_final %>%
  mutate(vomit = case_when(VOMITO == 1 ~ "yes",
                           VOMITO == 2 ~ "no",
                           TRUE ~ NA_character_))

# Abdominal pain
data_final <- data_final %>%
  mutate(abd_pain = case_when(DOR_ABD == 1 ~ "yes",
                              DOR_ABD == 2 ~ "no",
                              TRUE ~ NA_character_))

# Fatigue
data_final <- data_final %>%
  mutate(fatigue = case_when(FADIGA == 1 ~ "yes",
                             FADIGA == 2 ~ "no",
                             TRUE ~ NA_character_))

# Olfactory loss
data_final <- data_final %>%
  mutate(olfac_loss = case_when(PERD_OLFT == 1 ~ "yes",
                                 PERD_OLFT == 2 ~ "no",
                                 TRUE ~ NA_character_))

# Loss of taste
data_final <- data_final %>%
  mutate(loss_taste = case_when(PERD_PALA == 1 ~ "yes",
                                 PERD_PALA == 2 ~ "no",
                                 TRUE ~ NA_character_))

# Any respiratory symptom
df <- data_final %>%
  select(dyspnea, fatigue, desaturation, resp_disc)

soma <- function(x){
  if (sum(is.na(x))==4)
    return(NA_character_)
  else
    return(sum(!is.na(x) & x=="yes"))
}
data_final$qt_sintomas_resp_aux <- apply(df,1,soma)

data_final <- data_final %>%

```

```

mutate(resp_symp = case_when(qt_sintomas_resp_aux >=1 ~ "yes",
                             qt_sintomas_resp_aux ==0 ~ "no",
                             TRUE ~ NA_character_))

# Any symptom
df <- data_final %>%
  select(dyspnea,fatigue,desaturation,resp_disc,
         fever,cough,sore_throat,diarrhea,vomit,abd_pain,olfac_loss,loss_taste)
soma <- function(x){
  if (sum(is.na(x))==12)
    return(NA_character_)
  else
    return(sum(!is.na(x) & x=="yes"))
}
data_final$qt_sintomas_aux <- apply(df,1,soma)

data_final <- data_final %>%
  mutate(symptom = case_when(qt_sintomas_aux >= 1 ~ "yes",
                             qt_sintomas_aux == 0 ~ "no",
                             TRUE ~ NA_character_))

```

## Fever

```
with(data_final, ctable(vaccine, fever, prop = "r", useNA = "no", chisq = TRUE, OR=TRUE))
```

```

## Cross-Tabulation, Row Proportions
## vaccine * fever
## Data Frame: data_final
##
## -----
##      fever      no      yes      Total
## vaccine
##      no      842 (35.5%)  1529 (64.5%)  2371 (100.0%)
##      yes      255 (33.4%)   509 (66.6%)   764 (100.0%)
##      Total    1097 (35.0%)  2038 (65.0%)  3135 (100.0%)
## -----
##
## -----
## Chi.squared  df  p.value
## -----
##      1.0664    1  0.3018
## -----
##
## -----
## Odds Ratio  Lo - 95%  Hi - 95%
## -----
##      1.10      0.93    1.31
## -----

```

## Cough

```
with(data_final, ctable(vaccine, cough, prop = "r", useNA = "no", chisq = TRUE, OR=TRUE))
```

```
## Cross-Tabulation, Row Proportions
## vaccine * cough
## Data Frame: data_final
##
## -----
##      cough      no      yes      Total
## vaccine
##      no      594 (24.7%)  1808 (75.3%)  2402 (100.0%)
##      yes      189 (24.2%)   593 (75.8%)   782 (100.0%)
##      Total     783 (24.6%)  2401 (75.4%)  3184 (100.0%)
## -----
##
## -----
## Chi.squared  df  p.value
## -----
##      0.072      1  0.7884
## -----
##
## -----
## Odds Ratio  Lo - 95%  Hi - 95%
## -----
##      1.03      0.85    1.24
## -----
```

## Sore throat

```
with(data_final, ctable(vaccine, sore_throat, prop = "r", useNA = "no", chisq = TRUE, OR=TRUE))
```

```
## Cross-Tabulation, Row Proportions
## vaccine * sore_throat
## Data Frame: data_final
##
## -----
##      sore_throat      no      yes      Total
## vaccine
##      no      1524 (69.7%)  664 (30.3%)  2188 (100.0%)
##      yes      494 (68.0%)  233 (32.0%)   727 (100.0%)
##      Total     2018 (69.2%)  897 (30.8%)  2915 (100.0%)
## -----
##
## -----
## Chi.squared  df  p.value
## -----
##      0.6644      1  0.415
```

```
## -----
##
## -----
## Odds Ratio   Lo - 95%   Hi - 95%
## -----
##      1.08      0.90      1.30
## -----
```

## Dyspnea

```
with(data_final, ctable(vaccine, dyspnea, prop = "r", useNA = "no", chisq = TRUE, OR=TRUE))
```

```
## Cross-Tabulation, Row Proportions
## vaccine * dyspnea
## Data Frame: data_final
##
## -----
##           dyspnea           no           yes           Total
## vaccine
##      no           881 (37.4%)   1477 (62.6%)   2358 (100.0%)
##      yes           341 (44.9%)    418 (55.1%)    759 (100.0%)
##      Total        1222 (39.2%)   1895 (60.8%)   3117 (100.0%)
## -----
##
## -----
## Chi.squared   df   p.value
## -----
##      13.4724    1    2e-04
## -----
##
## -----
## Odds Ratio   Lo - 95%   Hi - 95%
## -----
##      0.73      0.62      0.86
## -----
```

## Respiratory discomfort

```
with(data_final, ctable(vaccine, resp_disc, prop = "r", useNA = "no", chisq = TRUE, OR=TRUE))
```

```
## Cross-Tabulation, Row Proportions
## vaccine * resp_disc
## Data Frame: data_final
##
## -----
##           resp_disc           no           yes           Total
## vaccine
```

```
##          no          1071 (47.2%)    1198 (52.8%)    2269 (100.0%)
##          yes          337 (45.1%)     411 (54.9%)     748 (100.0%)
##        Total          1408 (46.7%)    1609 (53.3%)    3017 (100.0%)
## -----
##
## -----
##   Chi.squared    df    p.value
## -----
##      0.9583        1    0.3276
## -----
##
## -----
##   Odds Ratio    Lo - 95%    Hi - 95%
## -----
##      1.09         0.92      1.29
## -----
```

## Desaturation

```
with(data_final, ctable(vaccine, desaturation, prop = "r", useNA = "no", chisq = TRUE, OR=TRUE))
```

```
## Cross-Tabulation, Row Proportions
## vaccine * desaturation
## Data Frame: data_final
##
## -----
##          desaturation          no          yes          Total
##   vaccine
##      no          1316 (58.4%)    938 (41.6%)    2254 (100.0%)
##      yes          491 (66.9%)    243 (33.1%)    734 (100.0%)
##      Total          1807 (60.5%)    1181 (39.5%)    2988 (100.0%)
## -----
##
## -----
##   Chi.squared    df    p.value
## -----
##      16.4163        1    1e-04
## -----
##
## -----
##   Odds Ratio    Lo - 95%    Hi - 95%
## -----
##      0.69         0.58      0.83
## -----
```

## Diarrhea

```
with(data_final, ctable(vaccine, diarrhea, prop = "r", useNA = "no", chisq = TRUE, OR=TRUE))
```

```
## Cross-Tabulation, Row Proportions
## vaccine * diarrhea
## Data Frame: data_final
##
##
## -----
##           diarrhea           no           yes           Total
## vaccine
##     no           1801 (84.6%)   329 (15.4%)   2130 (100.0%)
##     yes           595 (83.1%)   121 (16.9%)   716 (100.0%)
##     Total        2396 (84.2%)   450 (15.8%)   2846 (100.0%)
## -----
##
## -----
## Chi.squared  df  p.value
## -----
##    0.7447     1  0.3882
## -----
##
## -----
## Odds Ratio   Lo - 95%   Hi - 95%
## -----
##    1.11       0.89      1.40
## -----
```

## Vomit

```
with(data_final, ctable(vaccine, vomit, prop = "r", useNA = "no", chisq = TRUE, OR=TRUE))
```

```
## Cross-Tabulation, Row Proportions
## vaccine * vomit
## Data Frame: data_final
##
##
## -----
##           vomit           no           yes           Total
## vaccine
##     no           1833 (85.8%)   303 (14.2%)   2136 (100.0%)
##     yes           609 (84.8%)   109 (15.2%)   718 (100.0%)
##     Total        2442 (85.6%)   412 (14.4%)   2854 (100.0%)
## -----
##
## -----
## Chi.squared  df  p.value
## -----
##    0.3544     1  0.5516
## -----
##
## -----
## Odds Ratio   Lo - 95%   Hi - 95%
## -----
##    1.08       0.85      1.37
```

```
## -----
```

## Abdominal pain

```
with(data_final, ctable(vaccine, abd_pain, prop = "r", useNA = "no", chisq = TRUE, OR=TRUE))
```

```
## Cross-Tabulation, Row Proportions
```

```
## vaccine * abd_pain
```

```
## Data Frame: data_final
```

```
##
```

```
##
```

```
## -----
##          abd_pain          no          yes          Total
## vaccine
##      no          1410 (88.3%)    187 (11.7%)    1597 (100.0%)
##      yes          384 (87.3%)     56 (12.7%)     440 (100.0%)
##      Total        1794 (88.1%)    243 (11.9%)    2037 (100.0%)
## -----
```

```
##
```

```
## -----
## Chi.squared  df  p.value
## -----
```

```
##      0.2502      1      0.617
## -----
```

```
##
```

```
## -----
## Odds Ratio  Lo - 95%  Hi - 95%
## -----
```

```
##      1.10          0.80          1.51
## -----
```

```
##
```

## Fatigue

```
with(data_final, ctable(vaccine, fatigue, prop = "r", useNA = "no", chisq = TRUE, OR=TRUE))
```

```
## Cross-Tabulation, Row Proportions
```

```
## vaccine * fatigue
```

```
## Data Frame: data_final
```

```
##
```

```
##
```

```
## -----
##          fatigue          no          yes          Total
## vaccine
##      no          1117 (68.4%)    516 (31.6%)    1633 (100.0%)
##      yes          290 (64.4%)    160 (35.6%)     450 (100.0%)
##      Total        1407 (67.5%)    676 (32.5%)    2083 (100.0%)
## -----
```

```
##
```

```
## -----
```

```
## Chi.squared  df  p.value
## -----
##      2.3429    1  0.1259
## -----
##
## -----
## Odds Ratio   Lo - 95%   Hi - 95%
## -----
##      1.19      0.96     1.49
## -----
```

## Olfactory loss

```
with(data_final, ctable(vaccine, olfac_loss, prop = "r", useNA = "no", chisq = TRUE, OR=TRUE))
```

```
## Cross-Tabulation, Row Proportions
## vaccine * olfac_loss
## Data Frame: data_final
##
## -----
##      olfac_loss      no      yes      Total
## vaccine
##      no      1288 (79.1%)   340 (20.9%)   1628 (100.0%)
##      yes      320 (68.8%)   145 (31.2%)   465 (100.0%)
##      Total      1608 (76.8%)   485 (23.2%)   2093 (100.0%)
## -----
##
## -----
## Chi.squared  df  p.value
## -----
##      20.972    1    0
## -----
##
## -----
## Odds Ratio   Lo - 95%   Hi - 95%
## -----
##      1.72      1.36     2.16
## -----
```

## Loss of taste

```
with(data_final, ctable(vaccine, loss_taste, prop = "r", useNA = "no", chisq = TRUE, OR=TRUE))
```

```
## Cross-Tabulation, Row Proportions
## vaccine * loss_taste
## Data Frame: data_final
##
##
```



```
## -----
##           loss_taste           no           yes           Total
## vaccine
##     no           1302 (79.8%)    329 (20.2%)    1631 (100.0%)
##     yes           324 (70.3%)    137 (29.7%)    461 (100.0%)
##     Total        1626 (77.7%)    466 (22.3%)    2092 (100.0%)
## -----
##
## -----
## Chi.squared   df   p.value
## -----
##     18.371     1     0
## -----
##
## -----
## Odds Ratio   Lo - 95%   Hi - 95%
## -----
##     1.67       1.32     2.11
## -----
```

## Any respiratory symptom

```
with(data_final, ctable(vaccine, resp_symp, prop = "r", useNA = "no", chisq = TRUE, OR=TRUE))
```

```
## Cross-Tabulation, Row Proportions
## vaccine * resp_symp
## Data Frame: data_final
##
## -----
##           resp_symp           no           yes           Total
## vaccine
##     no           562 (23.2%)    1865 (76.8%)    2427 (100.0%)
##     yes           213 (27.2%)    570 (72.8%)    783 (100.0%)
##     Total        775 (24.1%)    2435 (75.9%)    3210 (100.0%)
## -----
##
## -----
## Chi.squared   df   p.value
## -----
##     5.0753     1   0.0243
## -----
##
## -----
## Odds Ratio   Lo - 95%   Hi - 95%
## -----
##     0.81       0.67     0.97
## -----
```

## Any symptom

```
with(data_final, ctable(vaccine, symptom, prop = "r", useNA = "no", chisq = TRUE, OR=TRUE))
```

```
## Cross-Tabulation, Row Proportions
## vaccine * symptom
## Data Frame: data_final
##
##
## -----
##          symptom          no          yes          Total
## vaccine
##      no          102 (4.1%)    2415 (95.9%)    2517 (100.0%)
##      yes           35 (4.3%)     781 (95.7%)     816 (100.0%)
##      Total        137 (4.1%)    3196 (95.9%)    3333 (100.0%)
## -----
##
## -----
## Chi.squared   df   p.value
## -----
##      0.0379      1   0.8457
## -----
##
## -----
## Odds Ratio   Lo - 95%   Hi - 95%
## -----
##      0.94      0.64      1.40
## -----
```

## Outcome

```
# Hospitalization
data_final <- data_final %>%
  mutate(hospitalization = case_when(HOSPITAL == 1 ~ "yes",
                                     HOSPITAL == 2 ~ "no",
                                     TRUE ~ NA_character_))

# ICU
data_final <- data_final %>%
  mutate(icu = case_when(UTI == 1 ~ "yes",
                        UTI == 2 ~ "no",
                        TRUE ~ NA_character_))

# Length time in ICU
data_final <- data_final %>%
  mutate(dt_enticu = as.Date(DT_ENTUTI, format = "%d/%m/%Y"),
         dt_exicu = as.Date(DT_SAIDUTI, format = "%d/%m/%Y"),
         time_icu = as.numeric(dt_exicu - dt_enticu)
  )
```

```

# ventilatory support
data_final <- data_final %>%
  mutate(ventilatory_support = case_when(SUPPORT_VEN == 1 ~ "invasive",
                                          SUPPORT_VEN == 2 ~ "non-invasive",
                                          SUPPORT_VEN == 3 ~ "no",
                                          TRUE ~ NA_character_))

# Intubation
data_final <- data_final %>%
  mutate(intubation = case_when(SUPPORT_VEN == 1 ~ "yes",
                                SUPPORT_VEN == 2 | SUPPORT_VEN == 3 ~ "no",
                                TRUE ~ NA_character_))

```

## Hospitalization

```
with(data_final, ctable(vaccine, hospitalization, prop = "r", useNA = "no", chisq = TRUE, OR=TRUE))
```

```

## Cross-Tabulation, Row Proportions
## vaccine * hospitalization
## Data Frame: data_final
##
##
## -----
##      hospitalization      no      yes      Total
## vaccine
##      no      70 (2.8%)   2454 (97.2%)   2524 (100.0%)
##      yes     35 (4.2%)    789 (95.8%)    824 (100.0%)
##      Total   105 (3.1%)   3243 (96.9%)   3348 (100.0%)
## -----
##
## -----
##      Chi.squared   df   p.value
## -----
##      3.972        1   0.0463
## -----
##
## -----
##      Odds Ratio   Lo - 95%   Hi - 95%
## -----
##      0.64         0.43       0.97
## -----

```

## ICU

```
with(data_final, ctable(vaccine, icu, prop = "r", useNA = "no", chisq = TRUE, OR=TRUE))
```

```

## Cross-Tabulation, Row Proportions
## vaccine * icu

```

```
## Data Frame: data_final
##
## -----
##          icu          no          yes          Total
## vaccine
##      no      1733 (73.4%)    629 (26.6%)    2362 (100.0%)
##      yes      597 (78.9%)    160 (21.1%)     757 (100.0%)
##      Total    2330 (74.7%)    789 (25.3%)    3119 (100.0%)
## -----
##
## -----
## Chi.squared  df  p.value
## -----
##      8.8679    1  0.0029
## -----
##
## -----
## Odds Ratio   Lo - 95%   Hi - 95%
## -----
##      0.74      0.61      0.90
## -----
```

## Length time in ICU

```
data_final_aux <- data_final %>%
  filter (icu == "yes")
```

```
datasummary((vaccine) ~ time_icu*(n+media+DP+mediana+q25+q75+IQR),
  data = data_final_aux, output = 'markdown')
```

|     | n      | media | DP    | mediana | q25  | q75   | IQR   |
|-----|--------|-------|-------|---------|------|-------|-------|
| no  | 399.00 | 12.15 | 12.63 | 8.00    | 4.00 | 17.00 | 13.00 |
| yes | 110.00 | 11.83 | 11.25 | 8.00    | 4.00 | 17.00 | 13.00 |

```
#t-test
t.test(time_icu ~ vaccine, data = data_final_aux)
```

```
##
## Welch Two Sample t-test
##
## data:  time_icu by vaccine
## t = 0.25552, df = 191.67, p-value = 0.7986
## alternative hypothesis: true difference in means between group no and group yes is not equal to 0
## 95 percent confidence interval:
##  -2.137340  2.773521
## sample estimates:
## mean in group no mean in group yes
##      12.14536      11.82727
```

## Ventilatory support

```
with(data_final, ctable(vaccine, ventilatory_support, prop = "r", useNA = "no", chisq = TRUE, OR=TRUE))
```

```
## Cross-Tabulation, Row Proportions
## vaccine * ventilatory_support
## Data Frame: data_final
##
## -----
##      ventilatory_support      invasive      no      non-invasive      Total
## vaccine
##      no      336 (14.3%)      1192 (50.6%)      827 (35.1%)      2355 (100.0%)
##      yes      68 ( 8.8%)      450 (58.5%)      251 (32.6%)      769 (100.0%)
##      Total      404 (12.9%)      1642 (52.6%)      1078 (34.5%)      3124 (100.0%)
## -----
##
## -----
##      Chi.squared      df      p.value
## -----
##      21.1094      2      0
## -----
```

## Intubation

```
with(data_final, ctable(vaccine, intubation, prop = "r", useNA = "no", chisq = TRUE, OR=TRUE))
```

```
## Cross-Tabulation, Row Proportions
## vaccine * intubation
## Data Frame: data_final
##
## -----
##      intubation      no      yes      Total
## vaccine
##      no      2019 (85.7%)      336 (14.3%)      2355 (100.0%)
##      yes      701 (91.2%)      68 ( 8.8%)      769 (100.0%)
##      Total      2720 (87.1%)      404 (12.9%)      3124 (100.0%)
## -----
##
## -----
##      Chi.squared      df      p.value
## -----
##      14.6735      1      1e-04
## -----
##
## -----
##      Odds Ratio      Lo - 95%      Hi - 95%
## -----
##      0.58      0.44      0.77
## -----
```

## Death

```
with(data_final, ctable(vaccine, death, prop = "r", useNA = "no", chisq = TRUE, OR=TRUE))
```

```
## Cross-Tabulation, Row Proportions
## vaccine * death
## Data Frame: data_final
##
## -----
##          death          cure          death          Total
## vaccine
##      no      2213 (87.2%)    325 (12.8%)    2538 (100.0%)
##      yes       788 (94.7%)     44 ( 5.3%)     832 (100.0%)
##      Total    3001 (89.1%)    369 (10.9%)    3370 (100.0%)
## -----
##
## -----
## Chi.squared  df    p.value
## -----
##      35.5435    1        0
## -----
##
## -----
## Odds Ratio   Lo - 95%   Hi - 95%
## -----
##      0.38      0.27      0.53
## -----
```

## Time between covid vaccine and first symptoms of covid-19

Selecting only the vaccinated cases

```
data_final_aux <- data_final %>%
  filter (vaccine == "yes")

data_final_aux$death <-
  factor(data_final_aux$death, levels = c("cure", "death"), label = c("cure", "death"))

datasummary((death) ~ time_vaccine_symptoms*(n+media+DP+mediana+q25+q75+IQR),
  data = data_final_aux, output = 'markdown')
```

|       | n      | media  | DP     | mediana | q25   | q75    | IQR    |
|-------|--------|--------|--------|---------|-------|--------|--------|
| cure  | 788.00 | 118.11 | 104.17 | 85.50   | 31.00 | 184.00 | 153.00 |
| death | 44.00  | 129.57 | 136.86 | 63.50   | 43.50 | 212.50 | 169.00 |

```
#t-test
t.test(time_vaccine_symptoms ~ death, data = data_final_aux)
```

```
##
## Welch Two Sample t-test
##
## data: time_vaccine_symptoms by death
## t = -0.54639, df = 45.824, p-value = 0.5875
## alternative hypothesis: true difference in means between group cure and group death is not equal to 0
## 95 percent confidence interval:
## -53.65500 30.74707
## sample estimates:
## mean in group cure mean in group death
## 118.1142 129.5682
```

## Propensity Scoring Matching (PSM)

```
data_final <- data_final %>%
  mutate(vaccine1 = ifelse(vaccine == "yes",1,0),
         id = 1:dim(data_final)[1])

data_final1 <- data_final %>%
  select(id, vaccine1, white_color, age, education2, asthma)

data_final1 <- data_final1 %>%
  mutate(
    white_color1 = ifelse(is.na(white_color) == TRUE, "na", white_color),
    education21 = ifelse(is.na(education2) == TRUE, "na", education2),
    asthma1 = ifelse(is.na(asthma) == TRUE, "na", asthma)
  )

#PSM - method = "nearest", ratio = 1
psm1 <- matchit(vaccine1 ~ white_color1 + age + education21 + asthma1, data = data_final1, method = "nearest", ratio = 1)

summary(psm1)
```

```
##
## Call:
## matchit(formula = vaccine1 ~ white_color1 + age + education21 +
## asthma1, data = data_final1, method = "nearest", ratio = 1)
##
## Summary of Balance for All Data:
```

|                    | Means Treated | Means Control | Std. Mean Diff. | Var. Ratio |
|--------------------|---------------|---------------|-----------------|------------|
| ## distance        | 0.2681        | 0.2399        | 0.3760          | 1.1378     |
| ## white_color1na  | 0.0709        | 0.0906        | -0.0768         | .          |
| ## white_color1no  | 0.4639        | 0.5165        | -0.1055         | .          |
| ## white_color1yes | 0.4651        | 0.3928        | 0.1450          | .          |
| ## age             | 29.8101       | 30.4358       | -0.0923         | 0.8685     |
| ## education211    | 0.1238        | 0.1383        | -0.0440         | .          |
| ## education212    | 0.4026        | 0.3176        | 0.1735          | .          |
| ## education213    | 0.1671        | 0.0981        | 0.1849          | .          |
| ## education21na   | 0.3065        | 0.4460        | -0.3026         | .          |
| ## asthma1na       | 0.5577        | 0.5528        | 0.0099          | .          |
| ## asthma1no       | 0.3882        | 0.4145        | -0.0539         | .          |

```

## asthma1yes          0.0541      0.0327      0.0945      .
##          eCDF Mean eCDF Max
## distance          0.1047    0.1801
## white_color1na     0.0197    0.0197
## white_color1no     0.0526    0.0526
## white_color1yes    0.0723    0.0723
## age                0.0144    0.0444
## education211       0.0145    0.0145
## education212       0.0851    0.0851
## education213       0.0690    0.0690
## education21na      0.1395    0.1395
## asthma1na          0.0049    0.0049
## asthma1no          0.0263    0.0263
## asthma1yes         0.0214    0.0214
##
##
## Summary of Balance for Matched Data:
##          Means Treated Means Control Std. Mean Diff. Var. Ratio
## distance          0.2681      0.2679      0.0017    1.0072
## white_color1na     0.0709      0.0481      0.0890      .
## white_color1no     0.4639      0.4784     -0.0289      .
## white_color1yes    0.4651      0.4736     -0.0169      .
## age                29.8101     29.7488      0.0090    1.0768
## education211       0.1238      0.1094      0.0438      .
## education212       0.4026      0.4123     -0.0196      .
## education213       0.1671      0.1647      0.0064      .
## education21na      0.3065      0.3137     -0.0156      .
## asthma1na          0.5577      0.5745     -0.0339      .
## asthma1no          0.3882      0.3774      0.0222      .
## asthma1yes         0.0541      0.0481      0.0266      .
##          eCDF Mean eCDF Max Std. Pair Dist.
## distance          0.0003    0.0072      0.0024
## white_color1na     0.0228    0.0228      0.1639
## white_color1no     0.0144    0.0144      0.1446
## white_color1yes    0.0084    0.0084      0.1615
## age                0.0047    0.0180      0.2598
## education211       0.0144    0.0144      0.1241
## education212       0.0096    0.0096      0.1568
## education213       0.0024    0.0024      0.1740
## education21na      0.0072    0.0072      0.0626
## asthma1na          0.0168    0.0168      0.2226
## asthma1no          0.0108    0.0108      0.2195
## asthma1yes         0.0060    0.0060      0.1647
##
## Percent Balance Improvement:
##          Std. Mean Diff. Var. Ratio eCDF Mean eCDF Max
## distance          99.5      94.5      99.7      96.0
## white_color1na     -15.9      .      -15.9     -15.9
## white_color1no      72.6      .      72.6      72.6
## white_color1yes     88.4      .      88.4      88.4
## age                90.2      47.5      67.1      59.4
## education211         0.5      .         0.5         0.5
## education212       88.7      .      88.7      88.7
## education213       96.5      .      96.5      96.5

```



```
## education21na          94.8      .      94.8      94.8
## asthma1na             -243.8     .     -243.8    -243.8
## asthma1no              58.8      .      58.8      58.8
## asthma1yes             71.9      .      71.9      71.9
##
## Sample Sizes:
##           Control Treated
## All           2538      832
## Matched        832      832
## Unmatched     1706        0
## Discarded        0        0
```

```
plot(psm1, type = "jitter", interactive = FALSE)
```

## Distribution of Propensity Scores

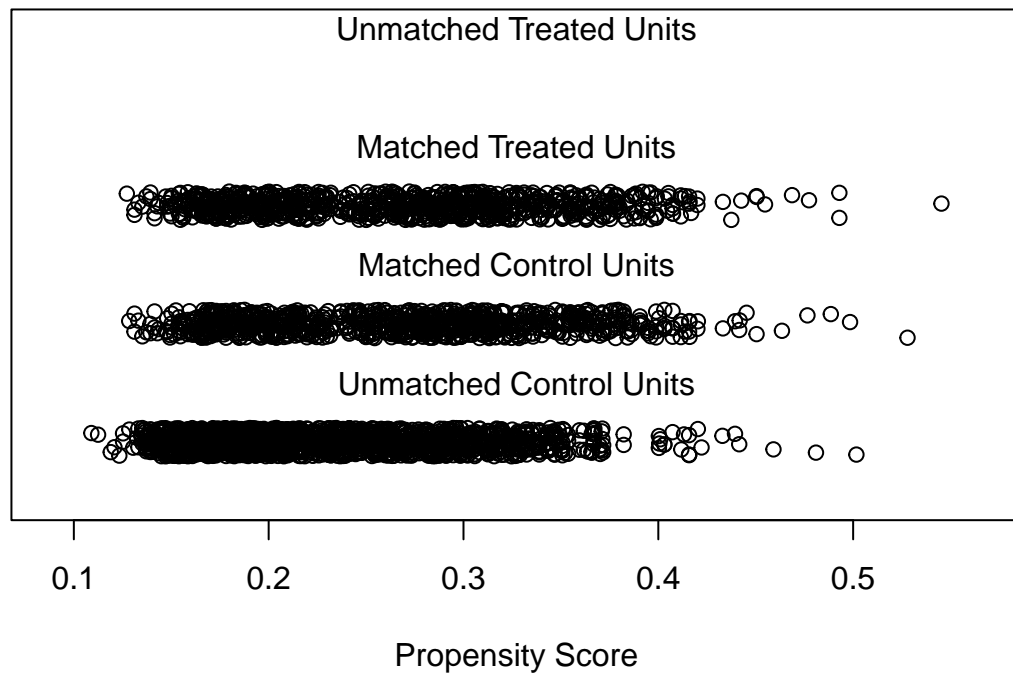

```
plot(psm1, type = "qq", interactive = FALSE,
     which.xs = c("white_color1", "age", "education21", "asthma1"))
```

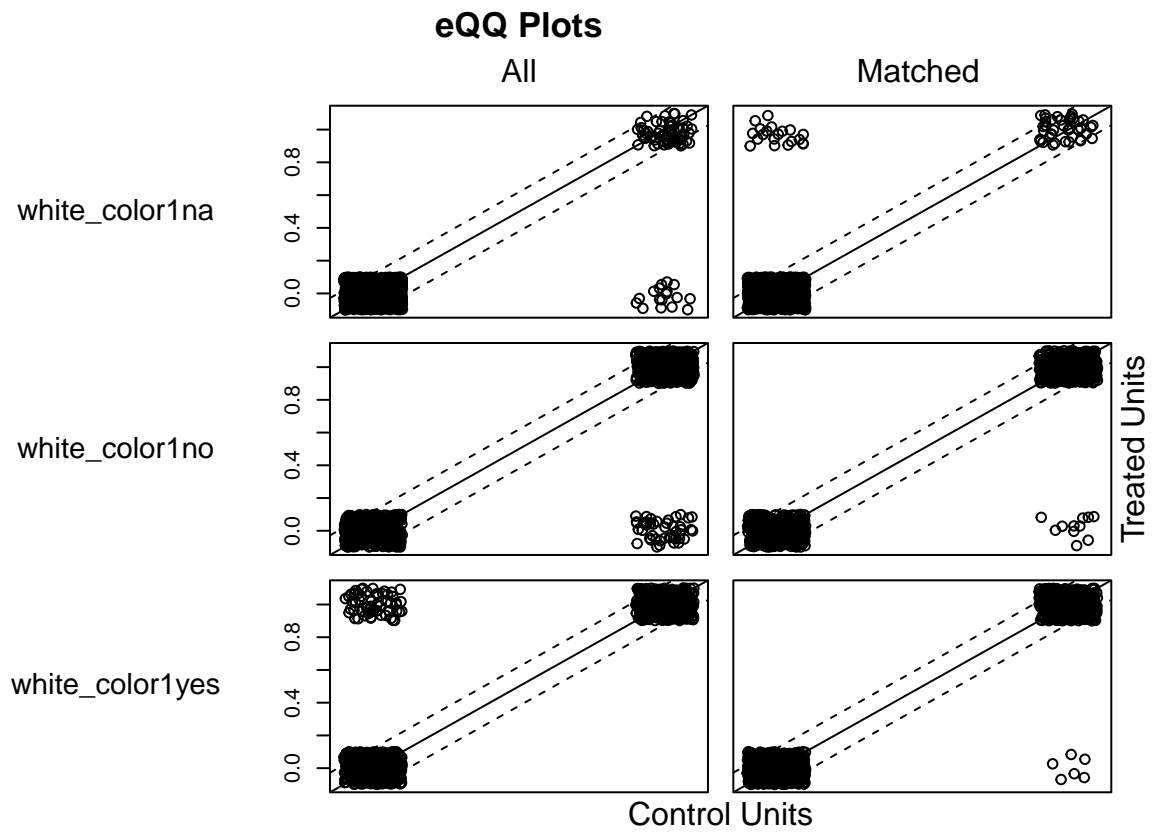

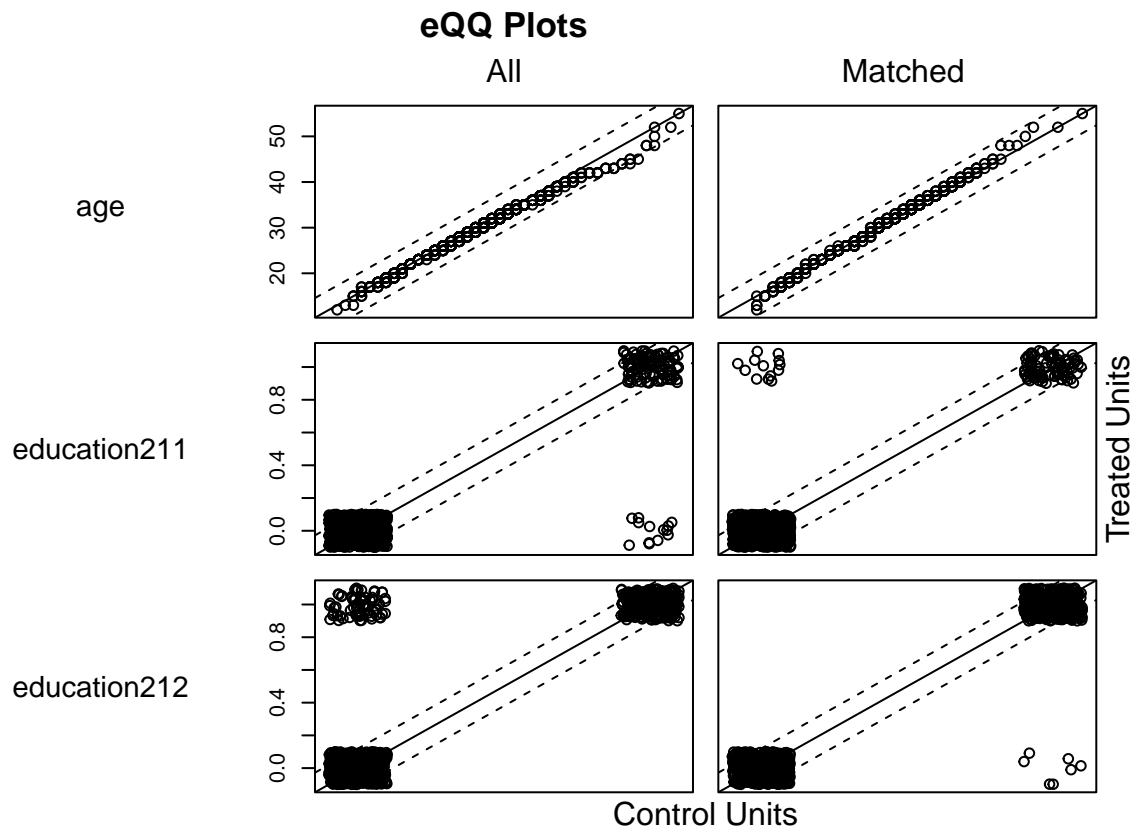

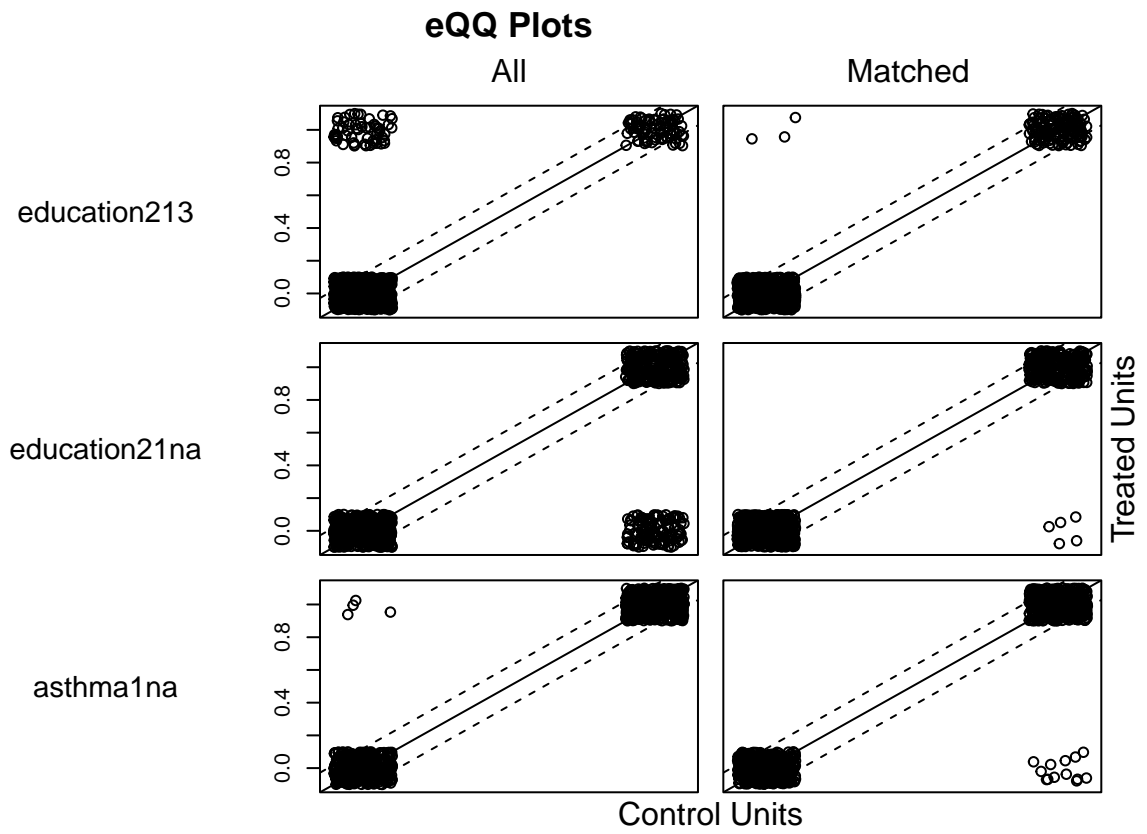

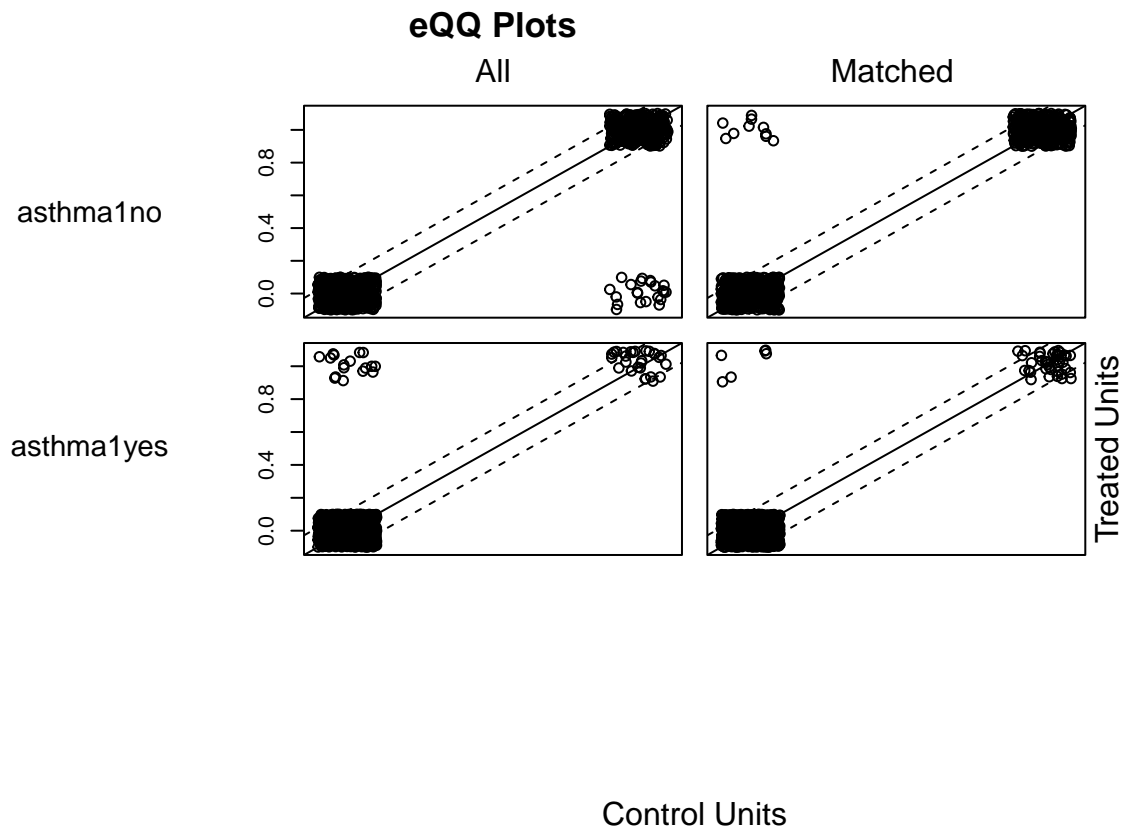

```
plot(summary(psm1))
```

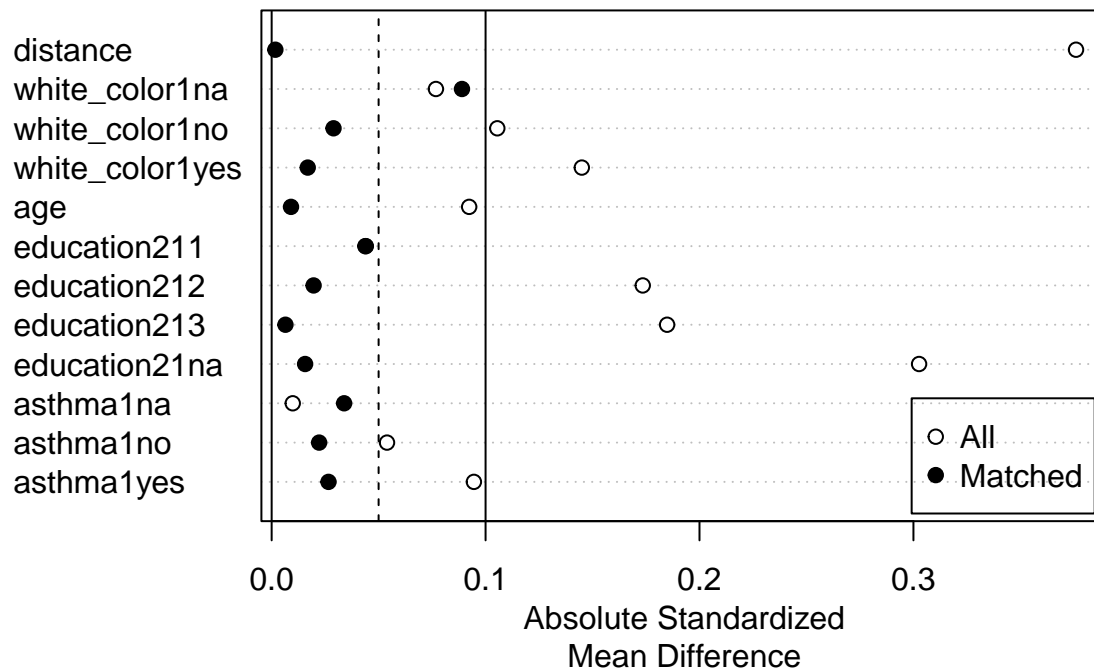

```
#PSM - method = "optimal", distance = "logit",
psm2 <- matchit(vaccine1 ~ white_color1 + age + education21 + asthma1, data_final1, method = "optimal",
summary(psm2)
```

```
##
## Call:
## matchit(formula = vaccine1 ~ white_color1 + age + education21 +
##   asthma1, data = data_final1, method = "optimal", distance = "logit",
##   estimand = "ATT")
##
## Summary of Balance for All Data:
##           Means Treated Means Control Std. Mean Diff. Var. Ratio
## distance           0.2681           0.2399           0.3760      1.1378
## white_color1na      0.0709           0.0906          -0.0768           .
## white_color1no      0.4639           0.5165          -0.1055           .
## white_color1yes      0.4651           0.3928           0.1450           .
## age                29.8101          30.4358          -0.0923      0.8685
## education211         0.1238           0.1383          -0.0440           .
## education212         0.4026           0.3176           0.1735           .
## education213         0.1671           0.0981           0.1849           .
## education21na        0.3065           0.4460          -0.3026           .
## asthma1na            0.5577           0.5528           0.0099           .
## asthma1no            0.3882           0.4145          -0.0539           .
## asthma1yes           0.0541           0.0327           0.0945           .
##           eCDF Mean eCDF Max
```

```

## distance      0.1047  0.1801
## white_color1na 0.0197  0.0197
## white_color1no 0.0526  0.0526
## white_color1yes 0.0723  0.0723
## age           0.0144  0.0444
## education211   0.0145  0.0145
## education212   0.0851  0.0851
## education213   0.0690  0.0690
## education21na  0.1395  0.1395
## asthma1na      0.0049  0.0049
## asthma1no      0.0263  0.0263
## asthma1yes     0.0214  0.0214
##
##
## Summary of Balance for Matched Data:
##           Means Treated Means Control Std. Mean Diff. Var. Ratio
## distance      0.2681      0.2680      0.0008      1.0037
## white_color1na 0.0709      0.0709      0.0000      .
## white_color1no 0.4639      0.5024     -0.0771      .
## white_color1yes 0.4651      0.4267      0.0771      .
## age           29.8101     29.4772      0.0491     0.9448
## education211   0.1238      0.1130      0.0328      .
## education212   0.4026      0.4062     -0.0074      .
## education213   0.1671      0.1707     -0.0097      .
## education21na  0.3065      0.3101     -0.0078      .
## asthma1na      0.5577      0.5625     -0.0097      .
## asthma1no      0.3882      0.3846      0.0074      .
## asthma1yes     0.0541      0.0529      0.0053      .
##           eCDF Mean eCDF Max Std. Pair Dist.
## distance      0.0011  0.0060      0.0061
## white_color1na 0.0000  0.0000      0.1250
## white_color1no 0.0385  0.0385      0.7423
## white_color1yes 0.0385  0.0385      0.7711
## age           0.0087  0.0300      0.9008
## education211   0.0108  0.0108      0.5657
## education212   0.0036  0.0036      0.5220
## education213   0.0036  0.0036      0.3899
## education21na  0.0036  0.0036      0.2998
## asthma1na      0.0048  0.0048      0.9486
## asthma1no      0.0036  0.0036      0.8854
## asthma1yes     0.0012  0.0012      0.3135
##
## Percent Balance Improvement:
##           Std. Mean Diff. Var. Ratio eCDF Mean eCDF Max
## distance      99.8      97.2      99.0      96.7
## white_color1na 100.0      .      100.0     100.0
## white_color1no 26.9      .      26.9      26.9
## white_color1yes 46.8      .      46.8      46.8
## age           46.8     59.7      39.8      32.3
## education211   25.4      .      25.4      25.4
## education212   95.8      .      95.8      95.8
## education213   94.8      .      94.8      94.8
## education21na  97.4      .      97.4      97.4
## asthma1na      1.8      .      1.8      1.8

```

```
## asthma1no          86.3      .      86.3      86.3
## asthma1yes         94.4      .      94.4      94.4
##
## Sample Sizes:
##           Control Treated
## All           2538      832
## Matched        832      832
## Unmatched     1706        0
## Discarded        0        0
```

```
plot(psm2, type = "jitter", interactive = FALSE)
```

## Distribution of Propensity Scores

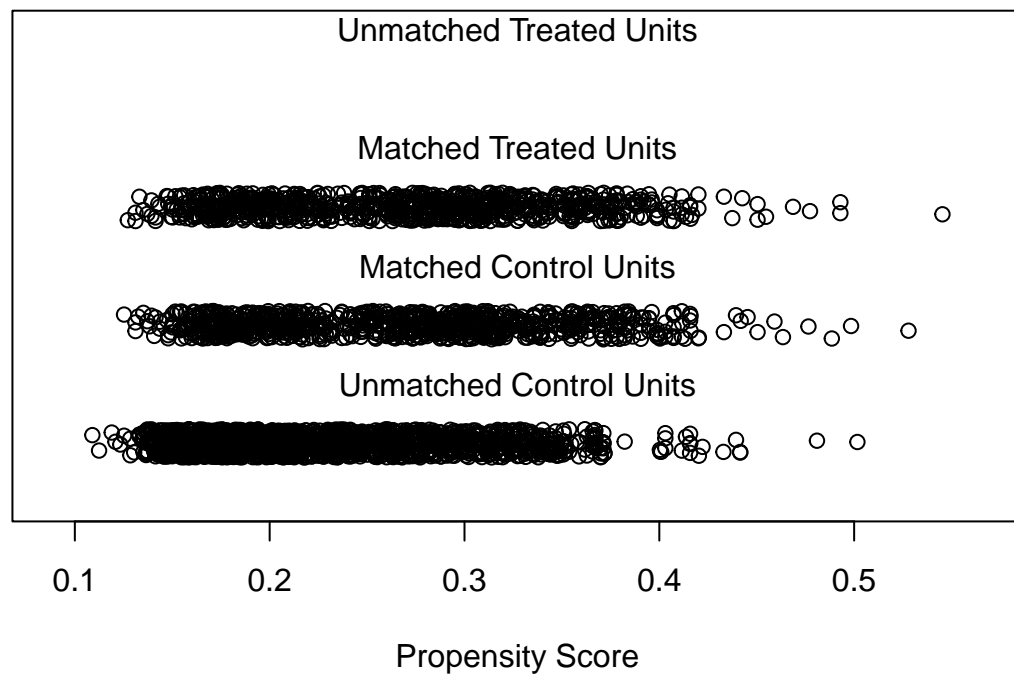

```
plot(psm2, type = "qq", interactive = FALSE,
     which.xs = c("white_color1", "age", "education21", "asthma1"))
```



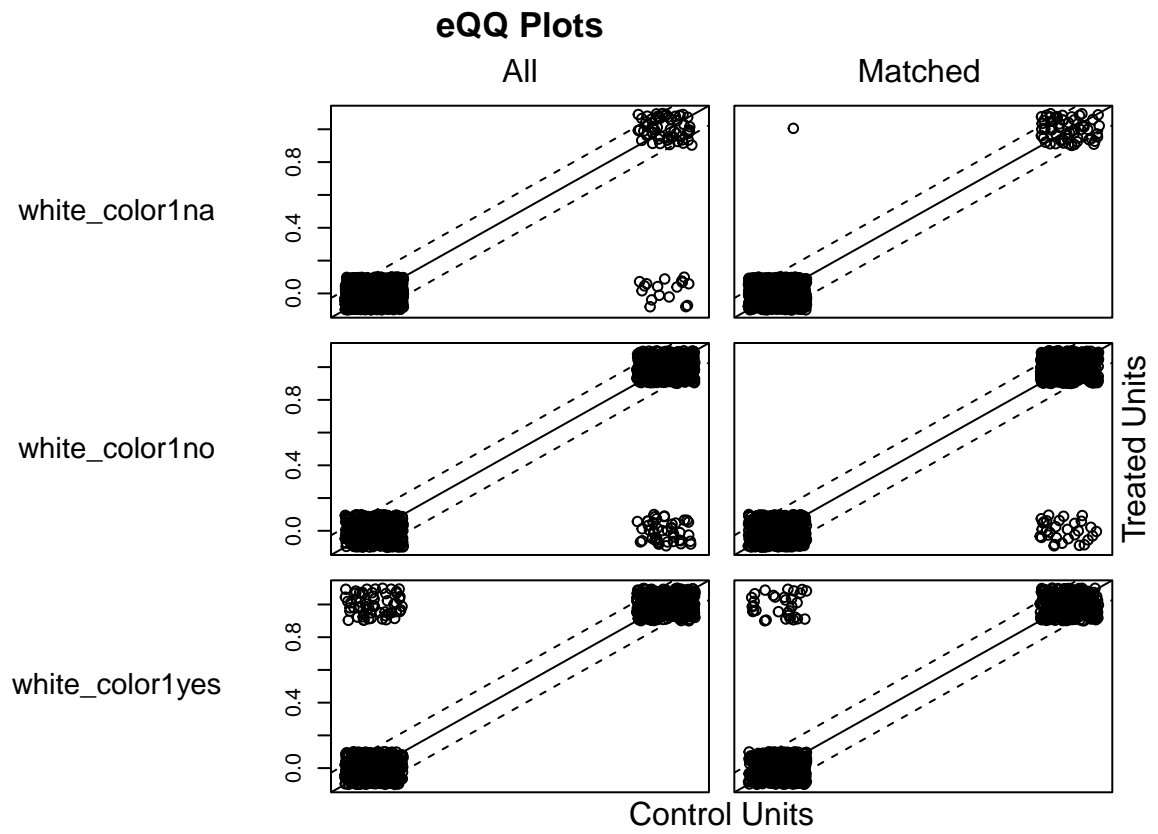

# eQQ Plots

All

Matched

age

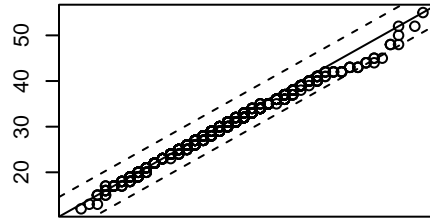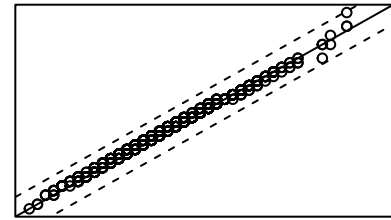

education211

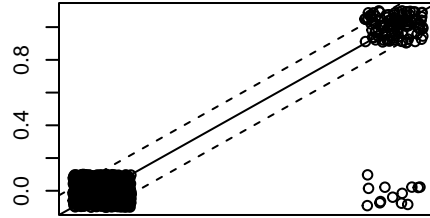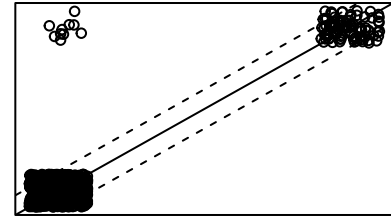

Treated Units

education212

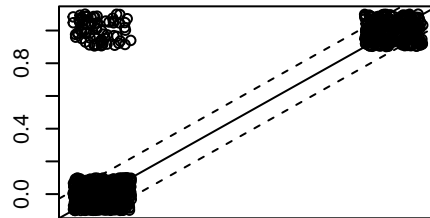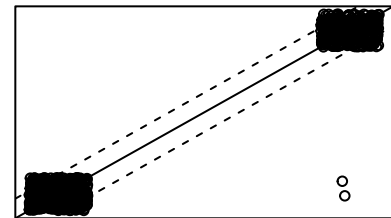

Control Units

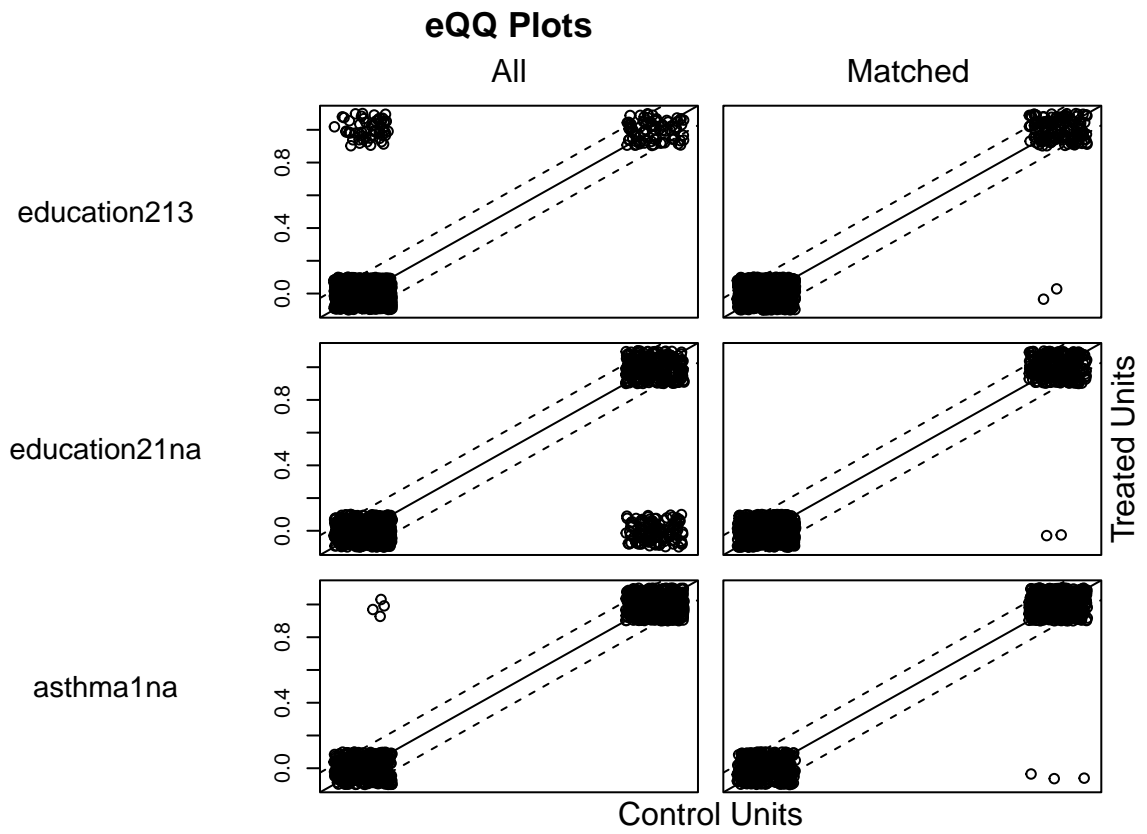

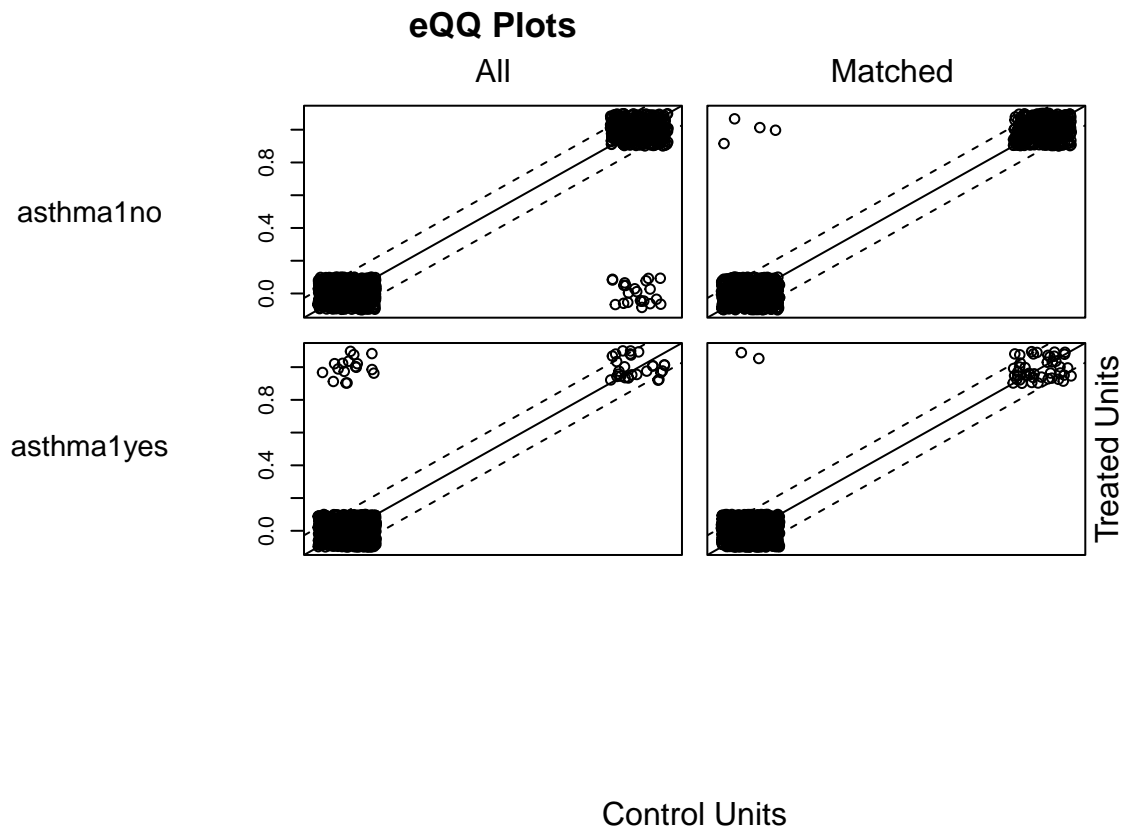

```
plot(summary(psm2))
```

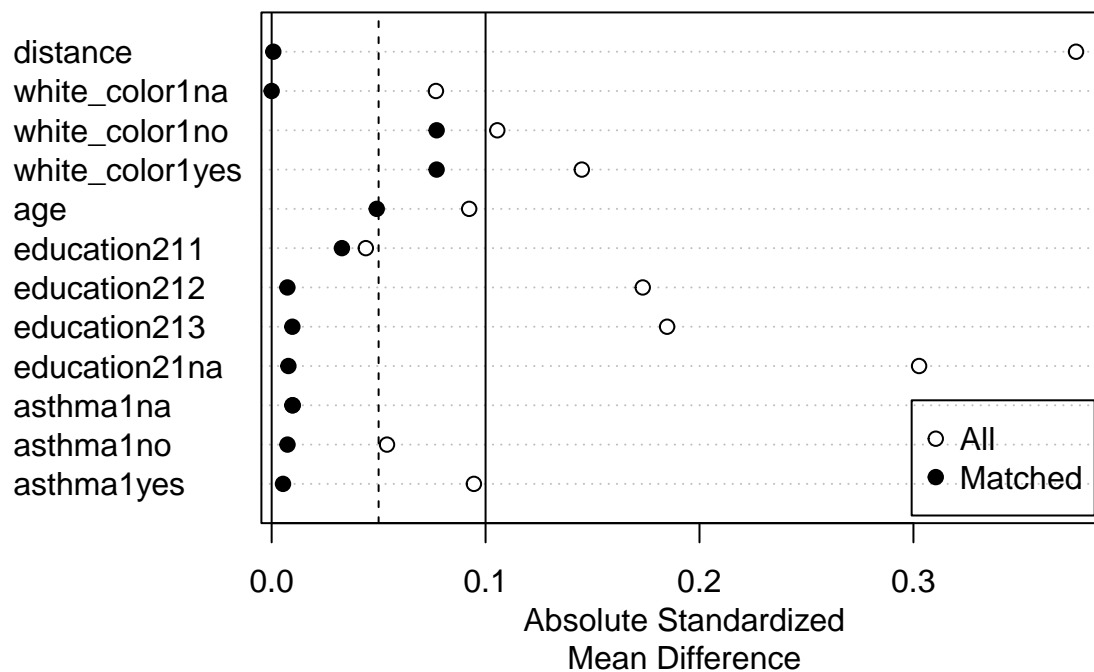

The best is PSM with the nearest method.

```
#Selecting only the selected observations
data_aux <- data_final1[psm1$weights==1, ]

#Now let's join data_aux with data_final

data_psm <- right_join(data_final, data_aux, by= c("id", "vaccine1", "white_color", "age", "education2"
freq(data_psm$vaccine)
```

```
##      n % val%
## no  832 50   50
## yes 832 50   50
```

## For symptoms

### Fever

```
with(data_psm, ctable(vaccine, fever, prop = "r", useNA = "no", chisq = TRUE, OR=TRUE))

## Cross-Tabulation, Row Proportions
## vaccine * fever
```

```
## Data Frame: data_psm
##
##
## -----
##      fever      no      yes      Total
## vaccine
##      no      282 (36.0%)    502 (64.0%)    784 (100.0%)
##      yes      255 (33.4%)    509 (66.6%)    764 (100.0%)
##      Total      537 (34.7%)    1011 (65.3%)    1548 (100.0%)
## -----
##
## -----
## Chi.squared  df  p.value
## -----
##      1.0362      1  0.3087
## -----
##
## -----
## Odds Ratio  Lo - 95%  Hi - 95%
## -----
##      1.12      0.91    1.38
## -----
```

## Cough

```
with(data_psm, ctable(vaccine, cough, prop = "r", useNA = "no", chisq = TRUE, OR=TRUE))
```

```
## Cross-Tabulation, Row Proportions
## vaccine * cough
## Data Frame: data_psm
##
##
## -----
##      cough      no      yes      Total
## vaccine
##      no      208 (26.2%)    585 (73.8%)    793 (100.0%)
##      yes      189 (24.2%)    593 (75.8%)    782 (100.0%)
##      Total      397 (25.2%)    1178 (74.8%)    1575 (100.0%)
## -----
##
## -----
## Chi.squared  df  p.value
## -----
##      0.7809      1  0.3769
## -----
##
## -----
## Odds Ratio  Lo - 95%  Hi - 95%
## -----
##      1.12      0.89    1.40
## -----
```

## Sore throat

```
with(data_psm, ctable(vaccine, sore_throat, prop = "r", useNA = "no", chisq = TRUE, OR=TRUE))
```

```
## Cross-Tabulation, Row Proportions
## vaccine * sore_throat
## Data Frame: data_psm
##
## -----
##      sore_throat      no      yes      Total
## vaccine
##      no      506 (68.6%)  232 (31.4%)  738 (100.0%)
##      yes      494 (68.0%)  233 (32.0%)  727 (100.0%)
##      Total    1000 (68.3%)  465 (31.7%)  1465 (100.0%)
## -----
##
## -----
##      Chi.squared  df  p.value
## -----
##      0.0384      1  0.8446
## -----
##
## -----
##      Odds Ratio  Lo - 95%  Hi - 95%
## -----
##      1.03      0.83      1.28
## -----
```

## Dyspnea

```
with(data_psm, ctable(vaccine, dyspnea, prop = "r", useNA = "no", chisq = TRUE, OR=TRUE))
```

```
## Cross-Tabulation, Row Proportions
## vaccine * dyspnea
## Data Frame: data_psm
##
## -----
##      dyspnea      no      yes      Total
## vaccine
##      no      275 (35.0%)  510 (65.0%)  785 (100.0%)
##      yes      341 (44.9%)  418 (55.1%)  759 (100.0%)
##      Total    616 (39.9%)  928 (60.1%)  1544 (100.0%)
## -----
##
## -----
##      Chi.squared  df  p.value
## -----
##      15.3488      1  1e-04
```

```
## -----
##
## -----
## Odds Ratio    Lo - 95%    Hi - 95%
## -----
##      0.66      0.54      0.81
## -----
```

## Respiratory discomfort

```
with(data_psm, ctable(vaccine, resp_disc, prop = "r", useNA = "no", chisq = TRUE, OR=TRUE))
```

```
## Cross-Tabulation, Row Proportions
## vaccine * resp_disc
## Data Frame: data_psm
##
## -----
##      resp_disc      no      yes      Total
## vaccine
##      no      347 (45.5%)  416 (54.5%)  763 (100.0%)
##      yes      337 (45.1%)  411 (54.9%)  748 (100.0%)
##      Total      684 (45.3%)  827 (54.7%)  1511 (100.0%)
## -----
##
## -----
## Chi.squared    df    p.value
## -----
##      0.013      1    0.9091
## -----
##
## -----
## Odds Ratio    Lo - 95%    Hi - 95%
## -----
##      1.02      0.83      1.25
## -----
```

## Desaturation

```
with(data_psm, ctable(vaccine, desaturation, prop = "r", useNA = "no", chisq = TRUE, OR=TRUE))
```

```
## Cross-Tabulation, Row Proportions
## vaccine * desaturation
## Data Frame: data_psm
##
## -----
##      desaturation      no      yes      Total
## vaccine
```



```
##          no          408 (53.3%)   358 (46.7%)   766 (100.0%)
##          yes          491 (66.9%)   243 (33.1%)   734 (100.0%)
##          Total        899 (59.9%)   601 (40.1%)  1500 (100.0%)
## -----
##
## -----
##  Chi.squared   df   p.value
## -----
##    28.4337     1     0
## -----
##
## -----
##  Odds Ratio   Lo - 95%   Hi - 95%
## -----
##    0.56        0.46      0.70
## -----
```

## Diarrhea

```
with(data_psm, ctable(vaccine, diarrhea, prop = "r", useNA = "no", chisq = TRUE, OR=TRUE))
```

```
## Cross-Tabulation, Row Proportions
## vaccine * diarrhea
## Data Frame: data_psm
##
## -----
##          diarrhea          no          yes          Total
##  vaccine
##    no          604 (83.3%)   121 (16.7%)   725 (100.0%)
##    yes          595 (83.1%)   121 (16.9%)   716 (100.0%)
##    Total        1199 (83.2%)   242 (16.8%)  1441 (100.0%)
## -----
##
## -----
##  Chi.squared   df   p.value
## -----
##    0.0013     1   0.9712
## -----
##
## -----
##  Odds Ratio   Lo - 95%   Hi - 95%
## -----
##    1.02        0.77      1.34
## -----
```

## Vomit

```
with(data_psm, ctable(vaccine, vomit, prop = "r", useNA = "no", chisq = TRUE, OR=TRUE))
```

```
## Cross-Tabulation, Row Proportions
## vaccine * vomit
## Data Frame: data_psm
##
##
## -----
##      vomit      no      yes      Total
## vaccine
##      no      618 (85.6%)  104 (14.4%)  722 (100.0%)
##      yes      609 (84.8%)  109 (15.2%)  718 (100.0%)
##      Total    1227 (85.2%)  213 (14.8%)  1440 (100.0%)
## -----
##
## -----
## Chi.squared  df  p.value
## -----
##      0.1162    1  0.7332
## -----
##
## -----
## Odds Ratio  Lo - 95%  Hi - 95%
## -----
##      1.06      0.80    1.42
## -----
```

## Abdominal pain

```
with(data_psm, ctable(vaccine, abd_pain, prop = "r", useNA = "no", chisq = TRUE, OR=TRUE))
```

```
## Cross-Tabulation, Row Proportions
## vaccine * abd_pain
## Data Frame: data_psm
##
##
## -----
##      abd_pain      no      yes      Total
## vaccine
##      no      564 (87.7%)   79 (12.3%)  643 (100.0%)
##      yes      384 (87.3%)   56 (12.7%)  440 (100.0%)
##      Total    948 (87.5%)  135 (12.5%) 1083 (100.0%)
## -----
##
## -----
## Chi.squared  df  p.value
## -----
##      0.0149    1  0.9028
## -----
##
## -----
## Odds Ratio  Lo - 95%  Hi - 95%
## -----
##      1.04      0.72    1.50
```

```
## -----
```

## Fatigue

```
with(data_psm, ctable(vaccine, fatigue, prop = "r", useNA = "no", chisq = TRUE, OR=TRUE))
```

```
## Cross-Tabulation, Row Proportions
## vaccine * fatigue
## Data Frame: data_psm
##
## -----
##      fatigue      no      yes      Total
## vaccine
##      no      428 (65.0%)  230 (35.0%)  658 (100.0%)
##      yes      290 (64.4%)  160 (35.6%)  450 (100.0%)
##      Total      718 (64.8%)  390 (35.2%) 1108 (100.0%)
## -----
##
## -----
##      Chi.squared  df  p.value
## -----
##      0.0201      1  0.8873
## -----
##
## -----
##      Odds Ratio  Lo - 95%  Hi - 95%
## -----
##      1.03      0.80      1.32
## -----
```

## Olfactory loss

```
with(data_psm, ctable(vaccine, olfac_loss, prop = "r", useNA = "no", chisq = TRUE, OR=TRUE))
```

```
## Cross-Tabulation, Row Proportions
## vaccine * olfac_loss
## Data Frame: data_psm
##
## -----
##      olfac_loss      no      yes      Total
## vaccine
##      no      511 (78.4%)  141 (21.6%)  652 (100.0%)
##      yes      320 (68.8%)  145 (31.2%)  465 (100.0%)
##      Total      831 (74.4%)  286 (25.6%) 1117 (100.0%)
## -----
##
## -----
```

```
## Chi.squared  df  p.value
## -----
##      12.5178    1    4e-04
## -----
##
## -----
## Odds Ratio    Lo - 95%    Hi - 95%
## -----
##      1.64      1.25      2.15
## -----
```

## Loss of taste

```
with(data_psm, ctable(vaccine, loss_taste, prop = "r", useNA = "no", chisq = TRUE, OR=TRUE))
```

```
## Cross-Tabulation, Row Proportions
## vaccine * loss_taste
## Data Frame: data_psm
##
## -----
##      loss_taste      no      yes      Total
## vaccine
##      no      519 (79.2%)  136 (20.8%)  655 (100.0%)
##      yes      324 (70.3%)  137 (29.7%)  461 (100.0%)
##      Total      843 (75.5%)  273 (24.5%)  1116 (100.0%)
## -----
##
## -----
## Chi.squared  df  p.value
## -----
##      11.2616    1    8e-04
## -----
##
## -----
## Odds Ratio    Lo - 95%    Hi - 95%
## -----
##      1.61      1.23      2.12
## -----
```

## Any respiratory symptom

```
with(data_psm, ctable(vaccine, resp_symp, prop = "r", useNA = "no", chisq = TRUE, OR=TRUE))
```

```
## Cross-Tabulation, Row Proportions
## vaccine * resp_symp
## Data Frame: data_psm
##
##
```

```
## -----
##           resp_symp           no           yes           Total
## vaccine
##     no           167 (20.7%)       641 (79.3%)       808 (100.0%)
##     yes           213 (27.2%)       570 (72.8%)       783 (100.0%)
##     Total         380 (23.9%)      1211 (76.1%)      1591 (100.0%)
## -----
##
## -----
## Chi.squared   df   p.value
## -----
##      8.9846      1   0.0027
## -----
##
## -----
## Odds Ratio   Lo - 95%   Hi - 95%
## -----
##      0.70      0.55      0.88
## -----
```

Any symptom

```
with(data_psm, ctable(vaccine, symptom, prop = "r", useNA = "no", chisq = TRUE, OR=TRUE))
```

```
## Cross-Tabulation, Row Proportions
## vaccine * symptom
## Data Frame: data_psm
##
## -----
##           symptom           no           yes           Total
## vaccine
##     no           31 (3.8%)       794 (96.2%)       825 (100.0%)
##     yes           35 (4.3%)       781 (95.7%)       816 (100.0%)
##     Total         66 (4.0%)      1575 (96.0%)      1641 (100.0%)
## -----
##
## -----
## Chi.squared   df   p.value
## -----
##      0.1784      1   0.6727
## -----
##
## -----
## Odds Ratio   Lo - 95%   Hi - 95%
## -----
##      0.87      0.53      1.43
## -----
```

## For outcomes

### Hospitalization

```
with(data_psm, ctable(vaccine, hospitalization, prop = "r", useNA = "no", chisq = TRUE, OR=TRUE))
```

```
## Cross-Tabulation, Row Proportions
## vaccine * hospitalization
## Data Frame: data_psm
##
## -----
##           hospitalization      no      yes      Total
## vaccine
##      no      21 (2.5%)    806 (97.5%)    827 (100.0%)
##      yes     35 (4.2%)    789 (95.8%)    824 (100.0%)
##      Total    56 (3.4%)   1595 (96.6%)   1651 (100.0%)
## -----
##
## -----
## Chi.squared  df  p.value
## -----
##      3.1729    1  0.0749
## -----
##
## -----
## Odds Ratio  Lo - 95%  Hi - 95%
## -----
##      0.59      0.34    1.02
## -----
```

### ICU

```
with(data_psm, ctable(vaccine, icu, prop = "r", useNA = "no", chisq = TRUE, OR=TRUE))
```

```
## Cross-Tabulation, Row Proportions
## vaccine * icu
## Data Frame: data_psm
##
## -----
##           icu      no      yes      Total
## vaccine
##      no      545 (69.7%)  237 (30.3%)  782 (100.0%)
##      yes     597 (78.9%)  160 (21.1%)  757 (100.0%)
##      Total   1142 (74.2%)  397 (25.8%)  1539 (100.0%)
## -----
##
## -----
## Chi.squared  df  p.value
```

```
## -----
##      16.4249      1      1e-04
## -----
##
## -----
## Odds Ratio      Lo - 95%      Hi - 95%
## -----
##      0.62      0.49      0.78
## -----
```

## Length time in ICU

```
data_psm_aux <- data_psm %>%
  filter (icu == "yes")
```

```
datasummary((vaccine) ~ time_icu*(n+media+DP+mediana+q25+q75+IQR),
  data = data_psm_aux, output = 'markdown')
```

|     | n      | media | DP    | mediana | q25  | q75   | IQR   |
|-----|--------|-------|-------|---------|------|-------|-------|
| no  | 152.00 | 11.93 | 13.40 | 7.00    | 3.00 | 15.00 | 12.00 |
| yes | 110.00 | 11.83 | 11.25 | 8.00    | 4.00 | 17.00 | 13.00 |

```
#t-test
t.test(time_icu ~ vaccine, data = data_psm_aux)
```

```
##
## Welch Two Sample t-test
##
## data: time_icu by vaccine
## t = 0.065737, df = 254.27, p-value = 0.9476
## alternative hypothesis: true difference in means between group no and group yes is not equal to 0
## 95 percent confidence interval:
## -2.906197 3.106914
## sample estimates:
## mean in group no mean in group yes
##      11.92763      11.82727
```

## Ventilatory support

```
with(data_psm, ctable(vaccine, ventilatory_support, prop = "r", useNA = "no", chisq = TRUE, OR=TRUE))

## Cross-Tabulation, Row Proportions
## vaccine * ventilatory_support
## Data Frame: data_psm
##
##
## -----
```

```
##          ventilatory_support    invasive      no    non-invasive      Total
## vaccine
##      no          122 (15.5%)   353 (44.9%)   311 (39.6%)   786 (100.0%)
##      yes          68 ( 8.8%)   450 (58.5%)   251 (32.6%)   769 (100.0%)
##      Total        190 (12.2%)   803 (51.6%)   562 (36.1%)  1555 (100.0%)
## -----
##
## -----
## Chi.squared   df   p.value
## -----
##      33.2885    2     0
## -----
```

## Intubation

```
with(data_psm, ctable(vaccine, intubation, prop = "r", useNA = "no", chisq = TRUE, OR=TRUE))
```

```
## Cross-Tabulation, Row Proportions
## vaccine * intubation
## Data Frame: data_psm
##
## -----
##          intubation      no      yes      Total
## vaccine
##      no          664 (84.5%)   122 (15.5%)   786 (100.0%)
##      yes          701 (91.2%)    68 ( 8.8%)   769 (100.0%)
##      Total        1365 (87.8%)   190 (12.2%)  1555 (100.0%)
## -----
##
## -----
## Chi.squared   df   p.value
## -----
##      15.5497    1   1e-04
## -----
##
## -----
## Odds Ratio    Lo - 95%   Hi - 95%
## -----
##      0.53      0.39      0.72
## -----
```

## Death

```
with(data_psm, ctable(vaccine, death, prop = "r", useNA = "no", chisq = TRUE, OR=TRUE))
```

```
## Cross-Tabulation, Row Proportions
## vaccine * death
## Data Frame: data_psm
```



```
##
##
## -----
##      death      cure      death      Total
## vaccine
##      no      711 (85.5%)  121 (14.5%)  832 (100.0%)
##      yes      788 (94.7%)   44 ( 5.3%)  832 (100.0%)
##      Total    1499 (90.1%)  165 ( 9.9%) 1664 (100.0%)
## -----
##
## -----
## Chi.squared  df  p.value
## -----
##      38.8593    1      0
## -----
##
## -----
## Odds Ratio   Lo - 95%   Hi - 95%
## -----
##      0.33      0.23      0.47
## -----
```

## Vaccination and mortality maps

```
data_final_vac <- data_final %>%
  filter(vaccine == "no")

valor_vac <- data.frame(table(data_final_vac$SG_UF))
colnames(valor_vac) <- c("uf", "n_vac")

valor <- data.frame(table(data_final$SG_UF))
colnames(valor) <- c("uf", "n")

dt_estado <- left_join(valor, valor_vac, by= "uf")

dt_estado <- dt_estado %>%
  mutate(n_vac = ifelse(is.na(n_vac), 0, n_vac))

dt_estado <- dt_estado %>%
  mutate(T1 = (n_vac/n)*100)

dt_estado1 <- dt_estado
dt_estado1 <- dt_estado1 %>%
  rename(T2=T1)

print(dt_estado)
```

```
##      uf      n n_vac      T1
## 1 AC      5      4 80.00000
## 2 AL      8      8 100.00000
## 3 AM    143    122 85.31469
```

```
## 4 AP 14 8 57.14286
## 5 BA 57 51 89.47368
## 6 CE 108 88 81.48148
## 7 DF 32 28 87.50000
## 8 ES 20 19 95.00000
## 9 GO 111 81 72.97297
## 10 MA 50 45 90.00000
## 11 MG 293 231 78.83959
## 12 MS 104 90 86.53846
## 13 MT 131 100 76.33588
## 14 PA 162 130 80.24691
## 15 PB 89 81 91.01124
## 16 PE 134 92 68.65672
## 17 PI 48 26 54.16667
## 18 PR 229 175 76.41921
## 19 RJ 124 102 82.25806
## 20 RN 44 27 61.36364
## 21 RO 72 56 77.77778
## 22 RR 3 3 100.00000
## 23 RS 201 125 62.18905
## 24 SC 110 79 71.81818
## 25 SE 10 7 70.00000
## 26 SP 1066 758 71.10694
## 27 TO 2 2 100.00000
```

```
dt <- rbind(c("AC",12), c("AL",27), c("AP",16), c("AM",13), c("BA",29),
            c("CE",23), c("DF",53), c("ES",32), c("GO",52), c("MA",21),
            c("MT",51), c("MS",50), c("MG",31), c("PA",15), c("PB",25),
            c("PR",41), c("PE",26), c("PI",22), c("RN",24), c("RS",43),
            c("RJ",33), c("RO",11), c("RR",14), c("SC",42), c("SP",35),
            c("SE",28), c("TO",17)) %>% data.table %>% `colnames<-`(c("uf","id"))

mapaUF <- readRDS("mapaUF.Rds")

dt2 <- full_join(dt, dt_estado, by = "uf")
g1 <- ggplot(dt2) +
  geom_map(map = mapaUF, color = 'gray30', aes_string(map_id = "id", fill = "T1")) +
  geom_path(data = mapaUF, color = 'gray30', size = .1, aes(x = long, y = lat, group = group)) +
  theme_void() + coord_equal() +
  labs(fill = "Not-vaccinated rate", title = "") +
  scale_fill_distiller(palette="Purples", trans="reverse", limits = c(100,0))

g1
```

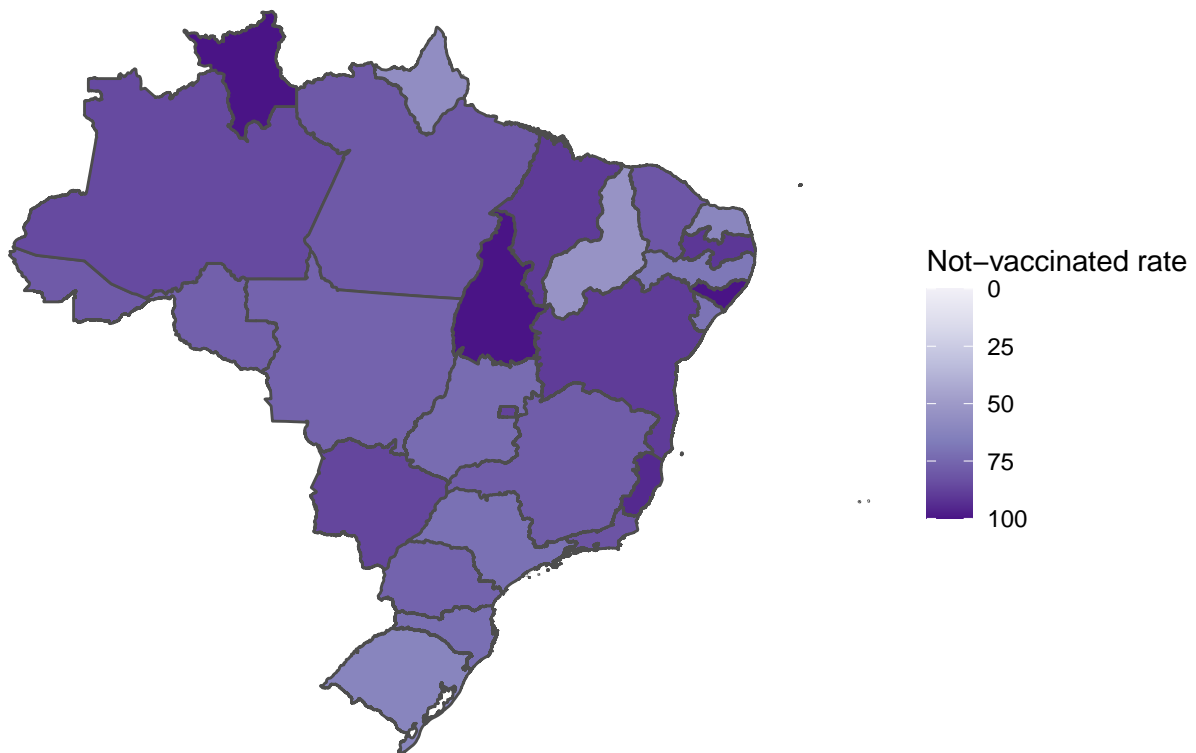

```
data_final_death <- data_final %>%
  filter(death == "death")

valor_death <- data.frame(table(data_final_death$SG_UF))
colnames(valor_death) <- c("uf", "n_death")

valor <- data.frame(table(data_final$SG_UF))
colnames(valor) <- c("uf", "n")

dt_estado <- left_join(valor, valor_death, by= "uf")

dt_estado <- dt_estado %>%
  mutate(n_death = ifelse(is.na(n_death), 0, n_death))

dt_estado <- dt_estado %>%
  mutate(T1 = (n_death/n)*100)

print(dt_estado)
```

```
##   uf    n n_death      T1
## 1  AC     5      2 40.000000
## 2  AL     8      2 25.000000
## 3  AM   143     22 15.384615
## 4  AP    14      0  0.000000
## 5  BA    57      2  3.508772
```

```
## 6 CE 108      10  9.259259
## 7 DF  32       4 12.500000
## 8 ES  20       7 35.000000
## 9 GO 111      24 21.621622
## 10 MA  50      17 34.000000
## 11 MG 293      31 10.580205
## 12 MS 104      12 11.538462
## 13 MT 131       9  6.870229
## 14 PA 162      20 12.345679
## 15 PB  89      13 14.606742
## 16 PE 134       6  4.477612
## 17 PI  48       3  6.250000
## 18 PR 229      23 10.043668
## 19 RJ 124      22 17.741935
## 20 RN  44       8 18.181818
## 21 RO  72      11 15.277778
## 22 RR   3       2 66.666667
## 23 RS 201      19  9.452736
## 24 SC 110      10  9.090909
## 25 SE  10       0  0.000000
## 26 SP 1066     89  8.348968
## 27 TO   2       1 50.000000
```

```
dt <- rbind(c("AC",12), c("AL",27), c("AP",16), c("AM",13), c("BA",29),
            c("CE",23), c("DF",53), c("ES",32), c("GO",52), c("MA",21),
            c("MT",51), c("MS",50), c("MG",31), c("PA",15), c("PB",25),
            c("PR",41), c("PE",26), c("PI",22), c("RN",24), c("RS",43),
            c("RJ",33), c("RO",11), c("RR",14), c("SC",42), c("SP",35),
            c("SE",28), c("TO",17)) %>% data.table %>% `colnames<-`(c("uf","id"))

mapaUF <- readRDS("mapaUF.Rds")

dt2 <- full_join(dt, dt_estado, by = "uf")
g2 <- ggplot(dt2) +
  geom_map(map = mapaUF, color = 'gray30', aes_string(map_id = "id", fill = "T1")) +
  geom_path(data = mapaUF, color = 'gray30', size = .1, aes(x = long, y = lat, group = group)) +
  theme_void() + coord_equal() +
  labs(fill = "Death rate", title = "") +
  scale_fill_distiller(palette="Purples", trans="reverse", limits = c(100,0))

g2
```

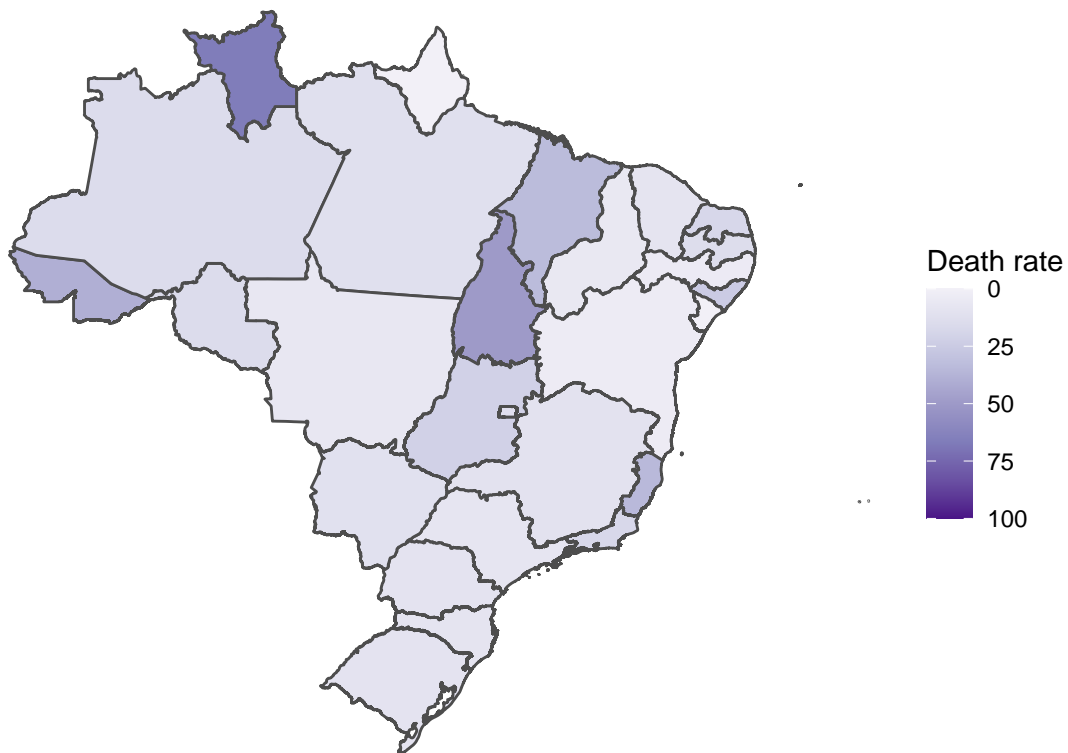

Spearman correlation between % unvaccinated and % death:

```
dt_cor <- full_join(dt_estado, dt_estado1, by = "uf")
```

```
SpearmanRho(dt_cor$T1, dt_cor$T2, conf.level=0.95)
```

```
##      rho    lwr.ci    upr.ci
## 0.6409043 0.3448889 0.8209691
```

```
cor.test(dt_cor$T1, dt_cor$T2, method = "spearman")
```

```
##
## Spearman's rank correlation rho
##
## data:  dt_cor$T1 and dt_cor$T2
## S = 1176.4, p-value = 0.000316
## alternative hypothesis: true rho is not equal to 0
## sample estimates:
##      rho
## 0.6409043
```
